# Supplementary material for: Therapeutic properties of Scutellaria baicalensis in db/db mice evaluated using Connectivity Map and network pharmacology
Source: PubMed Central journal article supplement (PMC5282526; doi:10.1038/srep41711), 2017-01-31

## Supplementary information

### Therapeutic properties of *Scutellaria baicalensis* in db/db mice evaluated using Connectivity Map and network pharmacology

Bu-Yeo Kim <sup>1,†,\*</sup>, Kwang Hoon Song <sup>2,†</sup>, Chi-Yeon Lim <sup>3</sup>, Su-In Cho <sup>4</sup>

<sup>1</sup> Herbal Medicine Research Division, Korea Institute of Oriental Medicine, Daejeon, Republic of Korea

<sup>2</sup> Mibyeong Research Center, Korea Institute of Oriental Medicine, Daejeon, Republic of Korea

<sup>3</sup> College of Medicine, Dongguk University, Ilsan, Gyeonggi-do, Republic of Korea

<sup>4</sup> School of Korean Medicine, Pusan National University, Yangsan, Republic of Korea

<sup>†</sup> Co-first author

\* Correspondence: Bu-Yeo Kim, PhD

Herbal Medicine Research Division, Korea Institute of Oriental Medicine,  
1672 Yuseong-daero, Yuseong-gu, Daejeon, 34054, Republic of Korea

Phone: +82 42 868 9401, Fax: + 82 42 868 9541

Email: buykim@kiom.re.k

Supplementary Table S1. cmap analysis

| Liver of db/db mice |                       |                               |                      | HepG2 treated with ESB    |                  |         |
|---------------------|-----------------------|-------------------------------|----------------------|---------------------------|------------------|---------|
| Rank <sup>1</sup>   | Name <sup>2</sup>     | Enrichment score <sup>3</sup> | p-value <sup>4</sup> | Name                      | Enrichment score | p-value |
| 1                   | Adiphenine            | 0.915                         | 0                    | Gw-8510                   | 0.943            | 0       |
| 2                   | Medrysone             | -0.827                        | 0.00002              | Ly-294002                 | -0.47            | 0       |
| 3                   | Biperiden             | 0.905                         | 0.00004              | Trichostatin A            | -0.344           | 0       |
| 4                   | 8-azaguanine          | -0.896                        | 0.0001               | Podophyllotoxin           | -0.931           | 0.00002 |
| 5                   | Monensin              | 0.793                         | 0.00016              | Medrysone                 | 0.842            | 0.00002 |
| 6                   | Viomycin              | 0.889                         | 0.00034              | Wortmannin                | -0.571           | 0.00002 |
| 7                   | Pha-00745360          | 0.68                          | 0.0004               | Monensin                  | -0.831           | 0.00006 |
| 8                   | Gw-8510               | -0.862                        | 0.0005               | Camptothecin              | 0.954            | 0.0001  |
| 9                   | Sulconazole           | -0.862                        | 0.0005               | Cycloserine               | 0.901            | 0.0001  |
| 10                  | Prestwick-692         | 0.878                         | 0.00052              | Apigenin                  | 0.888            | 0.00016 |
| 11                  | Gentamicin            | 0.878                         | 0.00052              | Gliclazide                | 0.886            | 0.00018 |
| 12                  | Etiocolanolone        | 0.744                         | 0.00054              | Levomepromazine           | -0.898           | 0.0002  |
| 13                  | Levonorgestrel        | -0.748                        | 0.0007               | Verteporfin               | 0.937            | 0.00042 |
| 14                  | Cp-320650-01          | 0.65                          | 0.00086              | 6-bromoindirubin-3'-oxime | 0.672            | 0.00108 |
| 15                  | Thapsigargin          | 0.917                         | 0.00096              | Thioridazine              | -0.402           | 0.00179 |
| 16                  | Alpha-estradiol       | -0.46                         | 0.0011               | Sanguinarine              | 0.963            | 0.00239 |
| 17                  | Omeprazole            | -0.832                        | 0.00117              | Clofazimine               | -0.735           | 0.00274 |
| 18                  | Timolol               | 0.837                         | 0.00123              | Adiphenine                | -0.729           | 0.00304 |
| 19                  | Doxazosin             | -0.83                         | 0.00127              | Alpha-estradiol           | 0.433            | 0.00309 |
| 20                  | Naringenin            | 0.835                         | 0.00133              | Nadolol                   | -0.798           | 0.00328 |
| 21                  | Thiamphenicol         | 0.761                         | 0.00146              | Riboflavin                | 0.783            | 0.00412 |
| 22                  | Atractyloside         | 0.751                         | 0.00176              | Irinotecan                | 0.864            | 0.00473 |
| 23                  | Apigenin              | -0.821                        | 0.00179              | Dipyridamole              | 0.649            | 0.00544 |
| 24                  | Phthalylsulfathiazole | -0.756                        | 0.00206              | Helveticoside             | -0.645           | 0.00554 |
| 25                  | Fludrocortisone       | 0.611                         | 0.00221              | Dicycloverine             | -0.695           | 0.00575 |
| 26                  | Levomepromazine       | 0.813                         | 0.00229              | Doxorubicin               | 0.854            | 0.00597 |
| 27                  | Luteolin              | -0.811                        | 0.00241              | Ronidazole                | 0.851            | 0.00619 |
| 28                  | Metronidazole         | 0.739                         | 0.00246              | Chenodeoxycholic acid     | -0.758           | 0.00696 |
| 29                  | Morantel              | -0.742                        | 0.00264              | Oxprenolol                | 0.752            | 0.00722 |
| 30                  | Quinpirole            | 0.795                         | 0.00348              | Hexestrol                 | 0.751            | 0.00742 |
| 31                  | Diphenhydramine       | 0.703                         | 0.00505              | Triflusal                 | 0.843            | 0.00755 |
| 32                  | Isometheptene         | 0.774                         | 0.00533              | H-7                       | 0.748            | 0.00774 |
| 33                  | Tretinoin             | -0.354                        | 0.00546              | Hexetidine                | -0.749           | 0.00794 |
| 34                  | Sitosterol            | -0.769                        | 0.00553              | Repaglinide               | 0.744            | 0.00804 |
| 35                  | Lasalocid             | 0.77                          | 0.00567              | Cinchonine                | -0.746           | 0.00822 |
| 36                  | Thiopramide           | 0.695                         | 0.00575              | Lanatoside C              | -0.627           | 0.0085  |
| 37                  | H-7                   | -0.764                        | 0.00585              | Amoxicillin               | 0.742            | 0.00855 |
| 38                  | Skimmianine           | -0.761                        | 0.00621              | 15-delta prostaglandin J2 | -0.409           | 0.00859 |
| 39                  | Hexestrol             | -0.761                        | 0.00625              | Chrysin                   | 0.835            | 0.00895 |
| 40                  | Diltiazem             | -0.695                        | 0.00653              | Trimetazidine             | 0.735            | 0.00975 |
| 41                  | Nadolol               | 0.759                         | 0.00688              | Benzamil                  | -0.619           | 0.00991 |
| 42                  | Alvespimycin          | -0.467                        | 0.0069               |                           |                  |         |
| 43                  | Felbinac              | 0.758                         | 0.00696              |                           |                  |         |
| 44                  | Guanadrel             | 0.686                         | 0.00711              |                           |                  |         |
| 45                  | Betahistine           | -0.751                        | 0.0074               |                           |                  |         |
| 46                  | Sanguinarine          | -0.937                        | 0.00769              |                           |                  |         |
| 47                  | Calcium folinate      | 0.673                         | 0.00879              |                           |                  |         |
| 48                  | Dapsone               | 0.672                         | 0.00881              |                           |                  |         |
| 49                  | Raloxifene            | 0.577                         | 0.0099               |                           |                  |         |

<sup>1</sup> Rank is based upon estimates of the likelihood that the enrichment of a set of instances in the ordered list of all instances for that result would be observed by chance in cmap database.

<sup>2</sup> Name given to a perturbation.

<sup>3</sup> A measure of the enrichment of those instances in the order list of all instances.

<sup>4</sup> A permutation p-value for that enrichment score.

Supplementary Table S2. Association of top-listed drugs from the cmap analysis of db/db mouse liver with diabetes-related diseases or conditions

| <b>Drugs</b>       | <b>Pharmacology</b>                                           | <b>Molecular mechanisms</b>                                                                                                                              | <b>References*</b> |
|--------------------|---------------------------------------------------------------|----------------------------------------------------------------------------------------------------------------------------------------------------------|--------------------|
| Monensin           | Carboxylic polyether ionophore                                | Regulation of the secretion of leptin hormone involved in glucose and insulin metabolism.                                                                | [1, 2]             |
| Thapsigargin       | Inducer of endoplasmic reticulum stress                       | Regulation of metabolism in adipocytes and glucose homeostasis in a mouse model of type 2 diabetes.                                                      | [3, 4]             |
| Biperiden          | Selective muscarinic M1 antagonist                            | Regulation of memory impairment and control of glucagon-like peptide secretion and insulin release                                                       | [5-9]              |
| Adiphenine         | Local anesthetic                                              | Inhibition of the activity of the acetylcholine receptor and regulation of glucose metabolism and diabetes                                               | [8-10]             |
| Naringenin         | Flavonoid with a various biological activities                | Antidiabetic, antiobesity, and immune-modulatory effects<br>Antioxidant and cholinesterase inhibitor against type 2 diabetes-induced memory dysfunction  | [11, 12]           |
| Timolol<br>Nadolol | Beta-blocker used in the treatment of cardiovascular diseases | Regulation of hyperglycemia-induced kidney or heart damage in diabetic patients through its antioxidant activities and/or by controlling calcium release | [13-15]            |

\* References

1. Levy, J. R. & Stevens, W. The effects of insulin, glucose, and pyruvate on the kinetics of leptin secretion. *Endocrinology* 142, 3558-3562 (2001).
2. Benzi, L. et al. Inhibition of endosomal acidification in normal cells mimics the derangements of cellular insulin and insulin-receptor metabolism observed in non-insulin-dependent diabetes mellitus. *Metabolism* 46, 1259-1265 (1997).
3. Burrill, J. S. et al. Inflammation and ER stress regulate branched-chain amino acid uptake and metabolism in adipocytes. *Mol. Endocrinol.* 29, 411-420 (2015).
4. Ozcan, U. et al. Chemical chaperones reduce ER stress and restore glucose homeostasis in a mouse model of type 2 diabetes. *Science* 313, 1137-1140 (2006).
5. Szczodry, O., van der Staay, F. J. & Arndt, S. S. Modelling Alzheimer-like cognitive deficits in rats using biperiden as putative cognition impairer. *Behav. Brain Res.* 274, 307-311 (2014).
6. Anini, Y. & Brubaker, P. L. Muscarinic receptors control glucagon-like peptide 1 secretion by human endocrine L cells. *Endocrinology* 144, 3244-3250 (2003).
7. Miguel, J. C., Abdel-Wahab, Y. H., Mathias, P. C. & Flatt, P. R. Muscarinic receptor subtypes mediate

- stimulatory and paradoxical inhibitory effects on an insulin-secreting beta cell line.. *Biochim. Biophys. Acta.* 1569, 45-50 (2002).
8. Gautam, D. et al. Role of the M3 muscarinic acetylcholine receptor in beta-cell function and glucose homeostasis. *Diabetes Obes. Metab.* 9 Suppl 2:158-169 (2007).
  9. Marrero, M. B. et al. An alpha7 nicotinic acetylcholine receptor-selective agonist reduces weight gain and metabolic changes in a mouse model of diabetes. *J. Pharmacol. Exp. Ther.* 332, 173-180 (2010).
  10. Spitzmaul, G., Gumilar, F., Dilger, J. P. & Bouzat, C. The local anaesthetics proadifen and adiphenine inhibit nicotinic receptors by different molecular mechanisms. *Br. J. Pharmacol.* 157, 804-817 (2009).
  11. Yoshida, H. et al. Naringenin suppresses macrophage infiltration into adipose tissue in an early phase of high-fat diet-induced obesity. *Biochem. Biophys. Res. Commun.* 454, 95-101 (2014).
  12. Rahigude, A. et al. Participation of antioxidant and cholinergic system in protective effect of naringenin against type-2 diabetes-induced memory dysfunction in rats. *Neuroscience* 226, 62-72 (2012).
  13. Gokturk, H. et al. Long-term treatment with a beta-blocker timolol attenuates renal-damage in diabetic rats via enhancing kidney antioxidant-defense system. *Mol. Cell Biochem.* 395, 177-186 (2014).
  14. Tuncay, E., Okatan, E. N., Vassort, G. & Turan, B.  $\beta$ -blocker timolol prevents arrhythmogenic  $Ca^{2+}$  release and normalizes  $Ca^{2+}$  and  $Zn^{2+}$  dyshomeostasis in hyperglycemic rat heart. *PLoS One* 8, e71014; 10.1371/journal.pone.0071014 (2013).
  15. Besana, A., Wang, D. W., George, A. L. Jr. & Schwartz, P. J. Nadolol block of Nav1.5 does not explain its efficacy in the long QT syndrome. *J. Cardiovasc. Pharmacol.* 59, 249-253 (2012).



Supplementary Table S3. Genes associated with each module.

| Liver of db/db mice |         |        |                        |                      |                        | HepG2 treated with ESB |         |        |                        |                      |                        |
|---------------------|---------|--------|------------------------|----------------------|------------------------|------------------------|---------|--------|------------------------|----------------------|------------------------|
| Module              | Symbol  | Degree | Betweenness Centrality | Closeness Centrality | Clustering Coefficient | Module                 | Symbol  | Degree | Betweenness Centrality | Closeness Centrality | Clustering Coefficient |
| 0                   | NFKB1   | 46     | 0.417                  | 0.427                | 0.051                  | 0                      | FYN     | 37     | 0.115                  | 0.391                | 0.111                  |
| 0                   | UBB     | 44     | 0.188                  | 0.385                | 0.085                  | 0                      | RAC1    | 36     | 0.15                   | 0.399                | 0.117                  |
| 0                   | TRAF6   | 24     | 0.07                   | 0.38                 | 0.105                  | 0                      | RHOA    | 28     | 0.087                  | 0.37                 | 0.122                  |
| 0                   | PSMD4   | 20     | 0.064                  | 0.359                | 0.289                  | 0                      | PIK3R2  | 28     | 0.077                  | 0.361                | 0.093                  |
| 0                   | PSMB6   | 13     | 0.003                  | 0.337                | 0.654                  | 0                      | PIK3R1  | 26     | 0.077                  | 0.368                | 0.145                  |
| 0                   | PSME2   | 12     | 0.002                  | 0.334                | 0.727                  | 0                      | GNAI1   | 21     | 0.061                  | 0.328                | 0.11                   |
| 0                   | PSME1   | 12     | 0.002                  | 0.334                | 0.727                  | 0                      | CBL     | 16     | 0.031                  | 0.337                | 0.342                  |
| 0                   | PSMF1   | 12     | 0.002                  | 0.334                | 0.727                  | 0                      | CBLB    | 15     | 0.027                  | 0.347                | 0.429                  |
| 0                   | RNF146  | 7      | 0                      | 0.294                | 1                      | 0                      | RHOG    | 11     | 0.004                  | 0.313                | 0.418                  |
| 0                   | TNKS2   | 7      | 0                      | 0.294                | 1                      | 0                      | PIK3R3  | 10     | 0.003                  | 0.318                | 0.333                  |
| 0                   | HECW1   | 7      | 0                      | 0.294                | 0.762                  | 0                      | CBLC    | 10     | 0.003                  | 0.326                | 0.533                  |
| 0                   | NFKBIE  | 7      | 0                      | 0.322                | 1                      | 0                      | PIK3R5  | 10     | 0.003                  | 0.318                | 0.333                  |
| 0                   | GMNN    | 7      | 0.022                  | 0.3                  | 0.714                  | 0                      | CTNND1  | 9      | 0.004                  | 0.329                | 0.417                  |
| 0                   | RNF43   | 3      | 0                      | 0.279                | 0.667                  | 0                      | BLK     | 8      | 0.001                  | 0.304                | 0.607                  |
| 0                   | MTPN    | 2      | 0                      | 0.305                | 1                      | 0                      | RHOB    | 8      | 0.004                  | 0.295                | 0.286                  |
| 0                   | PELI2   | 2      | 0                      | 0.296                | 1                      | 0                      | RHOC    | 8      | 0.004                  | 0.295                | 0.286                  |
| 0                   | RSPO3   | 2      | 0                      | 0.279                | 1                      | 0                      | RND1    | 7      | 0.001                  | 0.301                | 0.429                  |
| 0                   | TAX1BP1 | 2      | 0                      | 0.296                | 1                      | 0                      | DAPP1   | 7      | 0                      | 0.308                | 0.714                  |
| 0                   | UBQLN2  | 2      | 0                      | 0.265                | 1                      | 0                      | PIK3AP1 | 7      | 0                      | 0.282                | 0.571                  |
| 0                   | UBQLN1  | 2      | 0                      | 0.265                | 1                      | 0                      | ARHGEF1 | 6      | 0                      | 0.289                | 0.667                  |
| 0                   | ERC1    | 2      | 0                      | 0.305                | 1                      | 0                      | FGF16   | 5      | 0.004                  | 0.307                | 0.3                    |
| 0                   | TLR5    | 2      | 0                      | 0.305                | 1                      | 0                      | EFNA4   | 4      | 0                      | 0.3                  | 1                      |
| 0                   | PELI3   | 2      | 0                      | 0.296                | 1                      | 0                      | EPHA8   | 4      | 0                      | 0.3                  | 1                      |
| 0                   | PELI1   | 2      | 0                      | 0.296                | 1                      | 0                      | RTKN    | 4      | 0                      | 0.272                | 0.5                    |
| 0                   | LTA     | 2      | 0                      | 0.3                  | 1                      | 0                      | CIT     | 4      | 0.002                  | 0.282                | 0                      |
| 0                   | LTB     | 2      | 0                      | 0.3                  | 1                      | 0                      | PI4K2B  | 4      | 0                      | 0.274                | 0                      |
| 0                   | TRIM37  | 1      | 0                      | 0.3                  | 0                      | 0                      | ELMO1   | 3      | 0                      | 0.297                | 0.667                  |
| 0                   | CSR1    | 1      | 0                      | 0.3                  | 0                      | 0                      | NOX1    | 3      | 0                      | 0.286                | 1                      |
| 0                   | KLK8    | 1      | 0                      | 0.278                | 0                      | 0                      | CGN     | 3      | 0                      | 0.271                | 1                      |
| 0                   | BMF     | 1      | 0                      | 0.3                  | 0                      | 0                      | MYH1    | 3      | 0                      | 0.271                | 1                      |
| 0                   | FBXL3   | 1      | 0                      | 0.278                | 0                      | 0                      | MYH7B   | 3      | 0                      | 0.271                | 1                      |
| 0                   | UBQLN4  | 1      | 0                      | 0.265                | 0                      | 0                      | NOXO1   | 3      | 0                      | 0.286                | 1                      |
| 0                   | UBE2K   | 1      | 0                      | 0.265                | 0                      | 0                      | NOXA1   | 3      | 0                      | 0.286                | 1                      |
| 0                   | NFKBID  | 1      | 0                      | 0.3                  | 0                      | 0                      | SH3GLB2 | 3      | 0                      | 0.259                | 1                      |
| 0                   | ANKRD42 | 1      | 0                      | 0.3                  | 0                      | 0                      | SH3GLB1 | 3      | 0                      | 0.259                | 1                      |
| 0                   | IRAK3   | 1      | 0                      | 0.275                | 0                      | 0                      | SLA     | 2      | 0                      | 0.282                | 1                      |
| 0                   | IDO2    | 1      | 0                      | 0.278                | 0                      | 0                      | CNTNAP1 | 2      | 0                      | 0.293                | 1                      |
| 0                   | PPP2R4  | 1      | 0                      | 0.3                  | 0                      | 0                      | AXL     | 2      | 0                      | 0.274                | 0                      |
| 0                   | BEX1    | 1      | 0                      | 0.275                | 0                      | 0                      | DEF6    | 2      | 0                      | 0.288                | 1                      |
| 0                   | TMBIM6  | 1      | 0                      | 0.275                | 0                      | 0                      | RHOD    | 2      | 0                      | 0.266                | 0                      |
| 0                   | REV3L   | 1      | 0                      | 0.3                  | 0                      | 0                      | FARP2   | 2      | 0                      | 0.297                | 1                      |
| 0                   | NLRC3   | 1      | 0                      | 0.275                | 0                      | 0                      | GALR2   | 2      | 0                      | 0.247                | 1                      |
| 0                   | UBA7    | 1      | 0                      | 0.278                | 0                      | 0                      | BRPF3   | 2      | 0                      | 0.293                | 1                      |
| 0                   | CSF1    | 1      | 0                      | 0.3                  | 0                      | 0                      | FEZ2    | 2      | 0                      | 0.274                | 0                      |
| 0                   | MGLL    | 1      | 0                      | 0.3                  | 0                      | 0                      | ABLIM1  | 2      | 0                      | 0.297                | 1                      |
| 0                   | SLC38A2 | 1      | 0                      | 0.278                | 0                      | 0                      | FMN2    | 2      | 0                      | 0.228                | 0                      |
| 0                   | USP1    | 1      | 0                      | 0.278                | 0                      | 0                      | GAL     | 2      | 0                      | 0.247                | 1                      |
| 0                   | AQP1    | 1      | 0                      | 0.278                | 0                      | 0                      | PXK     | 1      | 0                      | 0.269                | 0                      |
| 0                   | SLC12A3 | 1      | 0                      | 0.278                | 0                      | 0                      | SPRY1   | 1      | 0                      | 0.252                | 0                      |
| 0                   | SLC38A4 | 1      | 0                      | 0.278                | 0                      | 0                      | RXFP3   | 1      | 0                      | 0.247                | 0                      |
| 0                   | GPBP1   | 1      | 0                      | 0.3                  | 0                      | 0                      | SNX12   | 1      | 0                      | 0.282                | 0                      |
| 0                   | ASXL2   | 1      | 0                      | 0.275                | 0                      | 0                      | DSCAM   | 1      | 0                      | 0.285                | 0                      |
| 0                   | DENND4A | 1      | 0                      | 0.3                  | 0                      | 0                      | PLEKHG6 | 1      | 0                      | 0.27                 | 0                      |
| 0                   | TIFA    | 1      | 0                      | 0.275                | 0                      | 0                      | TULP4   | 1      | 0                      | 0.282                | 0                      |
| 0                   | MAOA    | 1      | 0                      | 0.278                | 0                      | 0                      | DOCK11  | 1      | 0                      | 0.285                | 0                      |
| 0                   | SLC11A1 | 1      | 0                      | 0.3                  | 0                      | 0                      | LILRB3  | 1      | 0                      | 0.282                | 0                      |
| 0                   | MAOB    | 1      | 0                      | 0.278                | 0                      | 0                      | FARP1   | 1      | 0                      | 0.27                 | 0                      |
| 0                   | HSD11B2 | 1      | 0                      | 0.3                  | 0                      | 0                      | RHOT2   | 1      | 0                      | 0.265                | 0                      |
| 0                   | OTUD7B  | 1      | 0                      | 0.275                | 0                      | 0                      | RHOT1   | 1      | 0                      | 0.265                | 0                      |

| Liver of db/db mice |         |        |                        |                      |                        | HepG2 treated with ESB |           |        |                        |                      |                        |
|---------------------|---------|--------|------------------------|----------------------|------------------------|------------------------|-----------|--------|------------------------|----------------------|------------------------|
| Module              | Symbol  | Degree | Betweenness Centrality | Closeness Centrality | Clustering Coefficient | Module                 | Symbol    | Degree | Betweenness Centrality | Closeness Centrality | Clustering Coefficient |
| 0                   | CMPK2   | 1      | 0                      | 0.3                  | 0                      | 0                      | TAS2R50   | 1      | 0                      | 0.247                | 0                      |
| 0                   | PIGR    | 1      | 0                      | 0.3                  | 0                      | 0                      | SH2D1A    | 1      | 0                      | 0.282                | 0                      |
| 1                   | IL6ST   | 30     | 0.044                  | 0.334                | 0.29                   | 0                      | CDKL5     | 1      | 0                      | 0.282                | 0                      |
| 1                   | LIFR    | 26     | 0.033                  | 0.332                | 0.228                  | 0                      | GPR143    | 1      | 0                      | 0.247                | 0                      |
| 1                   | SOCS3   | 25     | 0.056                  | 0.358                | 0.39                   | 0                      | ARHGEF10  | 1      | 0                      | 0.27                 | 0                      |
| 1                   | CNTFR   | 25     | 0.148                  | 0.307                | 0.213                  | 0                      | RGS11     | 1      | 0                      | 0.247                | 0                      |
| 1                   | IL13RA1 | 24     | 0.004                  | 0.298                | 0.178                  | 0                      | PTGIR     | 1      | 0                      | 0.247                | 0                      |
| 1                   | PRLR    | 24     | 0.009                  | 0.288                | 0.087                  | 0                      | P2RY14    | 1      | 0                      | 0.247                | 0                      |
| 1                   | OSMR    | 23     | 0.002                  | 0.293                | 0.162                  | 0                      | PIR       | 1      | 0                      | 0.285                | 0                      |
| 1                   | IL22RA1 | 23     | 0.002                  | 0.282                | 0.162                  | 0                      | SPATA13   | 1      | 0                      | 0.285                | 0                      |
| 1                   | SOCS1   | 23     | 0.048                  | 0.344                | 0.443                  | 0                      | RHOF      | 1      | 0                      | 0.265                | 0                      |
| 1                   | IL10RB  | 23     | 0.002                  | 0.282                | 0.162                  | 0                      | RHOH      | 1      | 0                      | 0.265                | 0                      |
| 1                   | IL22RA2 | 22     | 0.002                  | 0.281                | 0.082                  | 0                      | RHOU      | 1      | 0                      | 0.265                | 0                      |
| 1                   | IL21R   | 22     | 0.002                  | 0.281                | 0.082                  | 0                      | RHOV      | 1      | 0                      | 0.265                | 0                      |
| 1                   | IL15RA  | 22     | 0.002                  | 0.281                | 0.082                  | 0                      | RHOBTB2   | 1      | 0                      | 0.265                | 0                      |
| 1                   | IFNA5   | 16     | 0                      | 0.298                | 0.592                  | 0                      | UNC5C     | 1      | 0                      | 0.282                | 0                      |
| 1                   | IFNA1   | 16     | 0                      | 0.298                | 0.592                  | 0                      | ARHGEF10L | 1      | 0                      | 0.27                 | 0                      |
| 1                   | IFNA7   | 16     | 0                      | 0.298                | 0.592                  | 0                      | CNKSRI    | 1      | 0                      | 0.27                 | 0                      |
| 1                   | IFNA14  | 16     | 0                      | 0.298                | 0.592                  | 0                      | P2RY4     | 1      | 0                      | 0.247                | 0                      |
| 1                   | SOCS2   | 15     | 0.006                  | 0.308                | 0.333                  | 0                      | PTGDR     | 1      | 0                      | 0.247                | 0                      |
| 1                   | IL4     | 14     | 0.019                  | 0.342                | 0.231                  | 0                      | DUSP15    | 1      | 0                      | 0.282                | 0                      |
| 1                   | EPO     | 14     | 0.019                  | 0.342                | 0.242                  | 0                      | RAP1GDS1  | 1      | 0                      | 0.285                | 0                      |
| 1                   | IL3     | 13     | 0.002                  | 0.288                | 0.141                  | 0                      | UGCG      | 1      | 0                      | 0.269                | 0                      |
| 1                   | IL15    | 13     | 0.019                  | 0.341                | 0.115                  | 0                      | MAPK8IP1  | 1      | 0                      | 0.282                | 0                      |
| 1                   | CTF1    | 12     | 0.002                  | 0.285                | 0.136                  | 0                      | RPIL1     | 1      | 0                      | 0.282                | 0                      |
| 1                   | CSF3    | 12     | 0.017                  | 0.335                | 0.091                  | 0                      | GPSM2     | 1      | 0                      | 0.247                | 0                      |
| 1                   | IL22    | 11     | 0                      | 0.263                | 0.109                  | 1                      | CTNNB1    | 55     | 0.3                    | 0.394                | 0.072                  |
| 1                   | SOCS4   | 11     | 0                      | 0.263                | 0.109                  | 1                      | CTBP2     | 20     | 0.084                  | 0.308                | 0.021                  |
| 1                   | CNTF    | 11     | 0                      | 0.263                | 0.109                  | 1                      | WNT1      | 4      | 0.011                  | 0.288                | 0.333                  |
| 1                   | SOCS7   | 11     | 0                      | 0.263                | 0.109                  | 1                      | APC2      | 3      | 0                      | 0.283                | 1                      |
| 1                   | IL11    | 11     | 0                      | 0.263                | 0.109                  | 1                      | PPP6C     | 3      | 0                      | 0.283                | 1                      |
| 1                   | IL24    | 11     | 0                      | 0.263                | 0.109                  | 1                      | FRAT2     | 3      | 0                      | 0.283                | 1                      |
| 1                   | IL20    | 11     | 0                      | 0.263                | 0.109                  | 1                      | SOST      | 2      | 0                      | 0.224                | 1                      |
| 1                   | OSM     | 11     | 0                      | 0.263                | 0.109                  | 1                      | PTPRM     | 2      | 0                      | 0.283                | 1                      |
| 1                   | IFNK    | 11     | 0                      | 0.263                | 0.109                  | 1                      | HINT1     | 2      | 0.018                  | 0.307                | 0                      |
| 1                   | CISH    | 6      | 0.001                  | 0.321                | 0.733                  | 1                      | KREMEN2   | 2      | 0                      | 0.224                | 1                      |
| 2                   | PPARA   | 26     | 0.053                  | 0.26                 | 0.431                  | 1                      | CDH8      | 2      | 0                      | 0.283                | 1                      |
| 2                   | NCOA1   | 23     | 0.078                  | 0.317                | 0.605                  | 1                      | BARHL2    | 1      | 0                      | 0.236                | 0                      |
| 2                   | MED17   | 19     | 0                      | 0.246                | 0.877                  | 1                      | EVX1      | 1      | 0                      | 0.236                | 0                      |
| 2                   | MED12   | 19     | 0                      | 0.246                | 0.877                  | 1                      | NKX6-1    | 1      | 0                      | 0.236                | 0                      |
| 2                   | NCOA3   | 19     | 0.059                  | 0.316                | 0.865                  | 1                      | VEZT      | 1      | 0                      | 0.283                | 0                      |
| 2                   | MED13   | 19     | 0                      | 0.246                | 0.877                  | 1                      | OTP       | 1      | 0                      | 0.236                | 0                      |
| 2                   | MED22   | 18     | 0                      | 0.246                | 0.961                  | 1                      | WNT2      | 1      | 0                      | 0.283                | 0                      |
| 2                   | MED25   | 18     | 0                      | 0.246                | 0.961                  | 1                      | IGFBP2    | 1      | 0                      | 0.283                | 0                      |
| 2                   | MED9    | 18     | 0                      | 0.246                | 0.961                  | 1                      | TBX1      | 1      | 0                      | 0.236                | 0                      |
| 2                   | MED14   | 18     | 0                      | 0.246                | 0.961                  | 1                      | SOX13     | 1      | 0                      | 0.236                | 0                      |
| 2                   | MED15   | 18     | 0                      | 0.246                | 0.961                  | 1                      | SOX14     | 1      | 0                      | 0.236                | 0                      |
| 2                   | MED29   | 18     | 0                      | 0.246                | 0.961                  | 1                      | LGALS9    | 1      | 0                      | 0.283                | 0                      |
| 2                   | MED24   | 18     | 0                      | 0.246                | 0.961                  | 1                      | L3MBTL3   | 1      | 0                      | 0.283                | 0                      |
| 2                   | MED27   | 18     | 0                      | 0.246                | 0.961                  | 1                      | GBX2      | 1      | 0                      | 0.236                | 0                      |
| 2                   | CDK19   | 18     | 0                      | 0.246                | 0.961                  | 1                      | ACP1      | 1      | 0                      | 0.283                | 0                      |
| 2                   | TGS1    | 16     | 0                      | 0.246                | 1                      | 1                      | FHIT      | 1      | 0                      | 0.283                | 0                      |
| 2                   | NCOA6   | 16     | 0                      | 0.246                | 1                      | 1                      | WNT10B    | 1      | 0                      | 0.283                | 0                      |
| 2                   | CHD9    | 15     | 0                      | 0.245                | 1                      | 1                      | WNT10A    | 1      | 0                      | 0.283                | 0                      |
| 2                   | FABP4   | 14     | 0                      | 0.243                | 1                      | 1                      | WNT16     | 1      | 0                      | 0.283                | 0                      |
| 2                   | TRIP4   | 5      | 0.006                  | 0.309                | 0.7                    | 1                      | WNT2B     | 1      | 0                      | 0.283                | 0                      |
| 2                   | CPT1C   | 4      | 0                      | 0.207                | 0.5                    | 1                      | OTX1      | 1      | 0                      | 0.236                | 0                      |
| 2                   | CPT1A   | 4      | 0                      | 0.207                | 0.5                    | 1                      | LBX1      | 1      | 0                      | 0.236                | 0                      |
| 2                   | ACSBG2  | 3      | 0                      | 0.207                | 0.667                  | 1                      | FOXJ1     | 1      | 0                      | 0.236                | 0                      |

| Liver of db/db mice |           |        |                        |                      |                        | HepG2 treated with ESB |         |        |                        |                      |                        |
|---------------------|-----------|--------|------------------------|----------------------|------------------------|------------------------|---------|--------|------------------------|----------------------|------------------------|
| Module              | Symbol    | Degree | Betweenness Centrality | Closeness Centrality | Clustering Coefficient | Module                 | Symbol  | Degree | Betweenness Centrality | Closeness Centrality | Clustering Coefficient |
| 2                   | ACSBG1    | 3      | 0                      | 0.207                | 0.667                  | 1                      | WNT9B   | 1      | 0                      | 0.283                | 0                      |
| 2                   | ACSL3     | 3      | 0                      | 0.207                | 0.667                  | 1                      | KLF8    | 1      | 0                      | 0.236                | 0                      |
| 2                   | FABP6     | 2      | 0                      | 0.241                | 1                      | 1                      | IRX5    | 1      | 0                      | 0.236                | 0                      |
| 2                   | NR1H3     | 2      | 0.019                  | 0.292                | 0                      | 1                      | RANBP3  | 1      | 0                      | 0.283                | 0                      |
| 2                   | SLC10A2   | 2      | 0                      | 0.241                | 1                      | 1                      | LHX9    | 1      | 0                      | 0.236                | 0                      |
| 2                   | LIPA      | 1      | 0                      | 0.206                | 0                      | 1                      | SHOX2   | 1      | 0                      | 0.236                | 0                      |
| 2                   | CYP7B1    | 1      | 0                      | 0.241                | 0                      | 1                      | ARX     | 1      | 0                      | 0.236                | 0                      |
| 2                   | CPT2      | 1      | 0                      | 0.206                | 0                      | 1                      | DLG5    | 1      | 0                      | 0.283                | 0                      |
| 2                   | ADIPOQ    | 1      | 0                      | 0.206                | 0                      | 2                      | CUL5    | 25     | 0.06                   | 0.27                 | 0.107                  |
| 3                   | GRB2      | 32     | 0.069                  | 0.354                | 0.153                  | 2                      | RELA    | 23     | 0.114                  | 0.384                | 0.202                  |
| 3                   | LCK       | 22     | 0.1                    | 0.382                | 0.156                  | 2                      | TCEB2   | 20     | 0.039                  | 0.274                | 0.168                  |
| 3                   | GAB2      | 17     | 0.015                  | 0.338                | 0.294                  | 2                      | PSMB5   | 16     | 0.023                  | 0.321                | 0.483                  |
| 3                   | FRS2      | 9      | 0.003                  | 0.317                | 0.611                  | 2                      | PSMB8   | 15     | 0.027                  | 0.326                | 0.552                  |
| 3                   | SHC3      | 8      | 0.001                  | 0.284                | 0.607                  | 2                      | PSMC4   | 14     | 0.013                  | 0.32                 | 0.637                  |
| 3                   | BLK       | 6      | 0.003                  | 0.326                | 0.133                  | 2                      | PSMF1   | 14     | 0.026                  | 0.331                | 0.626                  |
| 3                   | GRAP      | 6      | 0                      | 0.265                | 0.6                    | 2                      | PSMB2   | 13     | 0.011                  | 0.32                 | 0.718                  |
| 3                   | FGF22     | 6      | 0.002                  | 0.316                | 0.867                  | 2                      | PSME2   | 13     | 0.011                  | 0.32                 | 0.718                  |
| 3                   | FGF9      | 6      | 0.002                  | 0.316                | 0.867                  | 2                      | REL     | 10     | 0.003                  | 0.314                | 0.822                  |
| 3                   | PRKD3     | 5      | 0                      | 0.265                | 0.9                    | 2                      | NFKBIE  | 8      | 0                      | 0.287                | 1                      |
| 3                   | SHC2      | 4      | 0                      | 0.283                | 0.833                  | 2                      | RFWD2   | 6      | 0                      | 0.254                | 1                      |
| 3                   | DOK1      | 4      | 0                      | 0.286                | 0.333                  | 2                      | PTTG1   | 6      | 0                      | 0.254                | 1                      |
| 3                   | RASAL2    | 4      | 0                      | 0.265                | 1                      | 2                      | KRT8    | 4      | 0.004                  | 0.287                | 0.5                    |
| 3                   | NF1       | 4      | 0                      | 0.265                | 1                      | 2                      | ASB16   | 3      | 0.012                  | 0.297                | 0.333                  |
| 3                   | CD3E      | 3      | 0                      | 0.277                | 1                      | 2                      | WSB2    | 2      | 0                      | 0.216                | 1                      |
| 3                   | PDCD1LG2  | 3      | 0                      | 0.277                | 1                      | 2                      | ASB5    | 2      | 0                      | 0.216                | 1                      |
| 3                   | TRPV6     | 3      | 0                      | 0.3                  | 0.667                  | 2                      | ASB9    | 2      | 0                      | 0.216                | 1                      |
| 3                   | PDCD1     | 3      | 0                      | 0.277                | 1                      | 2                      | ASB10   | 2      | 0                      | 0.216                | 1                      |
| 3                   | SGMS1     | 3      | 0                      | 0.286                | 1                      | 2                      | ASB12   | 2      | 0                      | 0.216                | 1                      |
| 3                   | TFF3      | 2      | 0.001                  | 0.313                | 0                      | 2                      | ASB8    | 2      | 0                      | 0.216                | 1                      |
| 3                   | STAP1     | 2      | 0                      | 0.277                | 0                      | 2                      | ASB3    | 2      | 0                      | 0.216                | 1                      |
| 3                   | LIME1     | 1      | 0                      | 0.277                | 0                      | 2                      | ASB17   | 2      | 0                      | 0.216                | 1                      |
| 3                   | CD7       | 1      | 0                      | 0.277                | 0                      | 2                      | ASB13   | 2      | 0                      | 0.216                | 1                      |
| 3                   | PTPN22    | 1      | 0                      | 0.277                | 0                      | 2                      | ASB2    | 2      | 0                      | 0.216                | 1                      |
| 3                   | PDGFD     | 1      | 0                      | 0.262                | 0                      | 2                      | KLHL15  | 1      | 0                      | 0.213                | 0                      |
| 3                   | TFF2      | 1      | 0                      | 0.262                | 0                      | 2                      | PCNP    | 1      | 0                      | 0.213                | 0                      |
| 3                   | WIPF3     | 1      | 0                      | 0.262                | 0                      | 2                      | KLF5    | 1      | 0                      | 0.278                | 0                      |
| 3                   | WIPF2     | 1      | 0                      | 0.262                | 0                      | 2                      | TMBIM4  | 1      | 0                      | 0.243                | 0                      |
| 3                   | WIPF1     | 1      | 0                      | 0.262                | 0                      | 2                      | CRIP2   | 1      | 0                      | 0.278                | 0                      |
| 4                   | RAC2      | 28     | 0.158                  | 0.324                | 0.005                  | 2                      | COQ2    | 1      | 0                      | 0.243                | 0                      |
| 4                   | SEMA4D    | 2      | 0                      | 0.245                | 1                      | 2                      | UXT     | 1      | 0                      | 0.278                | 0                      |
| 4                   | ARHGAP9   | 2      | 0.008                  | 0.3                  | 0                      | 2                      | RAB40B  | 1      | 0                      | 0.213                | 0                      |
| 4                   | ARHGAP5   | 2      | 0.006                  | 0.246                | 0                      | 2                      | NFKBIZ  | 1      | 0                      | 0.278                | 0                      |
| 4                   | RND1      | 2      | 0                      | 0.245                | 1                      | 2                      | SPSB1   | 1      | 0                      | 0.213                | 0                      |
| 4                   | SYDE2     | 1      | 0                      | 0.245                | 0                      | 2                      | SPSB3   | 1      | 0                      | 0.213                | 0                      |
| 4                   | ARHGAP11A | 1      | 0                      | 0.245                | 0                      | 2                      | IL18R1  | 1      | 0                      | 0.278                | 0                      |
| 4                   | SYDE1     | 1      | 0                      | 0.245                | 0                      | 2                      | DCUNID1 | 1      | 0                      | 0.213                | 0                      |
| 4                   | FAM13A    | 1      | 0                      | 0.245                | 0                      | 2                      | BTBD1   | 1      | 0                      | 0.213                | 0                      |
| 4                   | ICMT      | 1      | 0                      | 0.245                | 0                      | 2                      | WSB1    | 1      | 0                      | 0.215                | 0                      |
| 4                   | THY1      | 1      | 0                      | 0.197                | 0                      | 3                      | NRF1    | 15     | 0.105                  | 0.299                | 0.01                   |
| 4                   | TAGAP     | 1      | 0                      | 0.245                | 0                      | 3                      | SETDB1  | 14     | 0.065                  | 0.274                | 0                      |
| 4                   | OPHN1     | 1      | 0                      | 0.245                | 0                      | 3                      | YY1     | 13     | 0.061                  | 0.251                | 0.013                  |
| 4                   | FAM13B    | 1      | 0                      | 0.245                | 0                      | 3                      | SAFB2   | 2      | 0                      | 0.239                | 1                      |
| 4                   | MYO9B     | 1      | 0                      | 0.245                | 0                      | 3                      | ZNF614  | 2      | 0.002                  | 0.231                | 0                      |
| 4                   | NET1      | 1      | 0                      | 0.245                | 0                      | 3                      | ZNF613  | 2      | 0.002                  | 0.231                | 0                      |
| 4                   | DIRAS1    | 1      | 0                      | 0.245                | 0                      | 3                      | DEDD2   | 1      | 0                      | 0.23                 | 0                      |
| 4                   | ARHGEF16  | 1      | 0                      | 0.245                | 0                      | 3                      | ALKBH5  | 1      | 0                      | 0.23                 | 0                      |
| 4                   | FGD1      | 1      | 0                      | 0.245                | 0                      | 3                      | PITPNB  | 1      | 0                      | 0.23                 | 0                      |
| 4                   | ARHGEF3   | 1      | 0                      | 0.245                | 0                      | 3                      | GPBP1L1 | 1      | 0                      | 0.23                 | 0                      |
| 4                   | ARHGAP23  | 1      | 0                      | 0.245                | 0                      | 3                      | ERH     | 1      | 0                      | 0.201                | 0                      |

| Liver of db/db mice |          |        |                        |                      |                        | HepG2 treated with ESB |          |        |                        |                      |                        |
|---------------------|----------|--------|------------------------|----------------------|------------------------|------------------------|----------|--------|------------------------|----------------------|------------------------|
| Module              | Symbol   | Degree | Betweenness Centrality | Closeness Centrality | Clustering Coefficient | Module                 | Symbol   | Degree | Betweenness Centrality | Closeness Centrality | Clustering Coefficient |
| 4                   | MYO9A    | 1      | 0                      | 0.245                | 0                      | 3                      | ALKBH8   | 1      | 0                      | 0.201                | 0                      |
| 4                   | GEM      | 1      | 0                      | 0.245                | 0                      | 3                      | NDRG3    | 1      | 0                      | 0.201                | 0                      |
| 4                   | ARHGEF17 | 1      | 0                      | 0.245                | 0                      | 3                      | ZFP64    | 1      | 0                      | 0.215                | 0                      |
| 4                   | CHN2     | 1      | 0                      | 0.245                | 0                      | 3                      | ZNF441   | 1      | 0                      | 0.215                | 0                      |
| 4                   | DEPDC7   | 1      | 0                      | 0.245                | 0                      | 3                      | ZNF524   | 1      | 0                      | 0.201                | 0                      |
| 4                   | ARHGAP29 | 1      | 0                      | 0.245                | 0                      | 3                      | ZNF416   | 1      | 0                      | 0.215                | 0                      |
| 4                   | ARHGAP19 | 1      | 0                      | 0.245                | 0                      | 3                      | ZNF436   | 1      | 0                      | 0.215                | 0                      |
| 5                   | SUZ12    | 24     | 0.14                   | 0.202                | 0.011                  | 3                      | ZNF433   | 1      | 0                      | 0.215                | 0                      |
| 5                   | NEUROG3  | 3      | 0                      | 0.168                | 0.667                  | 3                      | ZNF669   | 1      | 0                      | 0.215                | 0                      |
| 5                   | NKX2-2   | 3      | 0                      | 0.168                | 0.667                  | 3                      | SETDB2   | 1      | 0                      | 0.215                | 0                      |
| 5                   | ONECUT1  | 2      | 0                      | 0.168                | 1                      | 3                      | ETFDH    | 1      | 0                      | 0.23                 | 0                      |
| 5                   | NKX6-1   | 2      | 0                      | 0.168                | 1                      | 3                      | FAM120B  | 1      | 0                      | 0.23                 | 0                      |
| 5                   | CRLF1    | 2      | 0.14                   | 0.244                | 0                      | 3                      | ZNF32    | 1      | 0                      | 0.215                | 0                      |
| 5                   | SOX14    | 1      | 0                      | 0.168                | 0                      | 3                      | ZNF165   | 1      | 0                      | 0.215                | 0                      |
| 5                   | PTF1A    | 1      | 0                      | 0.168                | 0                      | 3                      | FBXO31   | 1      | 0                      | 0.201                | 0                      |
| 5                   | ONECUT2  | 1      | 0                      | 0.168                | 0                      | 3                      | ZNF576   | 1      | 0                      | 0.23                 | 0                      |
| 5                   | PRDM12   | 1      | 0                      | 0.168                | 0                      | 3                      | ZNF134   | 1      | 0                      | 0.215                | 0                      |
| 5                   | HMX2     | 1      | 0                      | 0.168                | 0                      | 3                      | LYPLA1   | 1      | 0                      | 0.23                 | 0                      |
| 5                   | NKX3-2   | 1      | 0                      | 0.168                | 0                      | 3                      | ZNF432   | 1      | 0                      | 0.201                | 0                      |
| 5                   | VSX2     | 1      | 0                      | 0.168                | 0                      | 3                      | ZNF689   | 1      | 0                      | 0.201                | 0                      |
| 5                   | FOXC2    | 1      | 0                      | 0.168                | 0                      | 3                      | AMACR    | 1      | 0                      | 0.23                 | 0                      |
| 5                   | OSR2     | 1      | 0                      | 0.168                | 0                      | 3                      | ABHD5    | 1      | 0                      | 0.23                 | 0                      |
| 5                   | HOXA6    | 1      | 0                      | 0.168                | 0                      | 3                      | ZNF551   | 1      | 0                      | 0.215                | 0                      |
| 5                   | BARHL1   | 1      | 0                      | 0.168                | 0                      | 3                      | ZBTB11   | 1      | 0                      | 0.201                | 0                      |
| 5                   | GSX1     | 1      | 0                      | 0.168                | 0                      | 4                      | PAFAH1B1 | 27     | 0.085                  | 0.329                | 0.399                  |
| 5                   | ZIC1     | 1      | 0                      | 0.168                | 0                      | 4                      | TUBB     | 24     | 0.073                  | 0.292                | 0.453                  |
| 5                   | GBX2     | 1      | 0                      | 0.168                | 0                      | 4                      | NDE1     | 22     | 0.013                  | 0.291                | 0.602                  |
| 5                   | FOXL2    | 1      | 0                      | 0.168                | 0                      | 4                      | CEP164   | 19     | 0.027                  | 0.267                | 0.702                  |
| 5                   | VAX1     | 1      | 0                      | 0.168                | 0                      | 4                      | PLK4     | 17     | 0.002                  | 0.26                 | 0.86                   |
| 5                   | RFX4     | 1      | 0                      | 0.168                | 0                      | 4                      | CEP72    | 17     | 0.005                  | 0.261                | 0.86                   |
| 5                   | HMX1     | 1      | 0                      | 0.168                | 0                      | 4                      | CEP78    | 16     | 0                      | 0.26                 | 0.975                  |
| 5                   | LBX2     | 1      | 0                      | 0.168                | 0                      | 4                      | NEDD1    | 16     | 0                      | 0.26                 | 0.975                  |
| 6                   | SMC3     | 20     | 0.12                   | 0.297                | 0.395                  | 4                      | CDK5RAP2 | 16     | 0                      | 0.26                 | 0.975                  |
| 6                   | STAG2    | 15     | 0                      | 0.231                | 0.714                  | 4                      | CEP57    | 16     | 0                      | 0.26                 | 0.975                  |
| 6                   | STAG1    | 15     | 0                      | 0.231                | 0.714                  | 4                      | ODF2     | 16     | 0                      | 0.26                 | 0.975                  |
| 6                   | PSSSB    | 13     | 0                      | 0.231                | 0.897                  | 4                      | PCNT     | 16     | 0                      | 0.26                 | 0.975                  |
| 6                   | WAPAL    | 13     | 0                      | 0.231                | 0.897                  | 4                      | SSNA1    | 16     | 0                      | 0.26                 | 0.975                  |
| 6                   | ZW10     | 13     | 0.006                  | 0.231                | 0.846                  | 4                      | TUBGCP5  | 15     | 0                      | 0.26                 | 1                      |
| 6                   | CENPO    | 12     | 0                      | 0.231                | 1                      | 4                      | TUBGCP2  | 15     | 0                      | 0.26                 | 1                      |
| 6                   | NDC80    | 12     | 0                      | 0.231                | 1                      | 4                      | TUBGCP3  | 15     | 0                      | 0.26                 | 1                      |
| 6                   | NUDC     | 12     | 0                      | 0.231                | 1                      | 4                      | XPO1     | 15     | 0.079                  | 0.338                | 0.238                  |
| 6                   | TAOK1    | 12     | 0                      | 0.231                | 1                      | 4                      | TMEM67   | 13     | 0                      | 0.259                | 1                      |
| 6                   | CENPI    | 12     | 0                      | 0.231                | 1                      | 4                      | PMF1     | 8      | 0.004                  | 0.305                | 0.786                  |
| 6                   | DSN1     | 12     | 0                      | 0.231                | 1                      | 4                      | RANGAP1  | 8      | 0.018                  | 0.283                | 0.75                   |
| 6                   | AHCTF1   | 12     | 0                      | 0.231                | 1                      | 4                      | TAOK1    | 7      | 0                      | 0.276                | 1                      |
| 6                   | ESCO1    | 5      | 0                      | 0.23                 | 1                      | 4                      | CENPL    | 7      | 0                      | 0.276                | 1                      |
| 6                   | SYCP3    | 4      | 0                      | 0.229                | 1                      | 4                      | SGOL2    | 7      | 0                      | 0.276                | 1                      |
| 6                   | ACD      | 4      | 0                      | 0.229                | 1                      | 4                      | MX1      | 2      | 0.005                  | 0.282                | 0                      |
| 6                   | P2RX6    | 1      | 0                      | 0.229                | 0                      | 4                      | DCX      | 2      | 0.003                  | 0.3                  | 0                      |
| 6                   | FEZ2     | 1      | 0                      | 0.229                | 0                      | 4                      | KIF1C    | 1      | 0                      | 0.226                | 0                      |
| 6                   | GPRC5A   | 1      | 0                      | 0.229                | 0                      | 4                      | XPO7     | 1      | 0                      | 0.253                | 0                      |
| 6                   | RINT1    | 1      | 0                      | 0.188                | 0                      | 4                      | MAP1S    | 1      | 0                      | 0.248                | 0                      |
| 6                   | CCDC124  | 1      | 0                      | 0.229                | 0                      | 4                      | DCPS     | 1      | 0                      | 0.253                | 0                      |
| 7                   | MAPK1    | 36     | 0.266                  | 0.4                  | 0.079                  | 4                      | TNFSF13  | 1      | 0                      | 0.253                | 0                      |
| 7                   | MAPK3    | 28     | 0.044                  | 0.368                | 0.124                  | 4                      | PLA2G7   | 1      | 0                      | 0.248                | 0                      |
| 7                   | VRK3     | 3      | 0                      | 0.287                | 1                      | 4                      | OTUD7B   | 1      | 0                      | 0.253                | 0                      |
| 7                   | DUSP3    | 3      | 0                      | 0.287                | 1                      | 5                      | TRAF2    | 24     | 0.167                  | 0.358                | 0.109                  |
| 7                   | IER3     | 2      | 0                      | 0.326                | 1                      | 5                      | UBE2D2   | 21     | 0.088                  | 0.293                | 0.029                  |
| 7                   | PLA2G5   | 2      | 0                      | 0.287                | 1                      | 5                      | TRAF1    | 10     | 0.005                  | 0.317                | 0.222                  |

| Liver of db/db mice |          |        |                        |                      |                        | HepG2 treated with ESB |          |        |                        |                      |                        |
|---------------------|----------|--------|------------------------|----------------------|------------------------|------------------------|----------|--------|------------------------|----------------------|------------------------|
| Module              | Symbol   | Degree | Betweenness Centrality | Closeness Centrality | Clustering Coefficient | Module                 | Symbol   | Degree | Betweenness Centrality | Closeness Centrality | Clustering Coefficient |
| 7                   | PLA2G6   | 2      | 0                      | 0.287                | 1                      | 5                      | UBE2D4   | 3      | 0.001                  | 0.27                 | 0.667                  |
| 7                   | PLA2G3   | 2      | 0                      | 0.287                | 1                      | 5                      | RFFL     | 2      | 0                      | 0.27                 | 1                      |
| 7                   | PDYN     | 2      | 0                      | 0.287                | 1                      | 5                      | TRIM23   | 2      | 0                      | 0.227                | 1                      |
| 7                   | PLA2G16  | 2      | 0                      | 0.287                | 1                      | 5                      | ZMAT3    | 2      | 0                      | 0.264                | 1                      |
| 7                   | PLA1A    | 2      | 0                      | 0.287                | 1                      | 5                      | TNFRSF18 | 2      | 0                      | 0.264                | 1                      |
| 7                   | PLA2G2F  | 2      | 0                      | 0.287                | 1                      | 5                      | MKRN3    | 2      | 0                      | 0.227                | 1                      |
| 7                   | PLA2G2E  | 2      | 0                      | 0.287                | 1                      | 5                      | TNFRSF19 | 2      | 0                      | 0.264                | 1                      |
| 7                   | PLA2G2D  | 2      | 0                      | 0.287                | 1                      | 5                      | RNF185   | 2      | 0.005                  | 0.227                | 0                      |
| 7                   | PTPRR    | 2      | 0                      | 0.287                | 1                      | 5                      | TNFSF9   | 2      | 0                      | 0.264                | 1                      |
| 7                   | EIF4EBP2 | 2      | 0                      | 0.287                | 1                      | 5                      | RNF126   | 2      | 0                      | 0.227                | 1                      |
| 7                   | CROCC    | 2      | 0                      | 0.287                | 1                      | 5                      | SMPD3    | 1      | 0                      | 0.264                | 0                      |
| 7                   | RPS6KA4  | 2      | 0                      | 0.287                | 1                      | 5                      | UBOX5    | 1      | 0                      | 0.227                | 0                      |
| 7                   | GABRR1   | 1      | 0                      | 0.286                | 0                      | 5                      | RIPK4    | 1      | 0                      | 0.264                | 0                      |
| 7                   | CAPNS1   | 1      | 0                      | 0.286                | 0                      | 5                      | RNF25    | 1      | 0                      | 0.227                | 0                      |
| 7                   | CMTM3    | 1      | 0                      | 0.286                | 0                      | 5                      | PJA2     | 1      | 0                      | 0.227                | 0                      |
| 8                   | VCP      | 20     | 0.095                  | 0.318                | 0.068                  | 5                      | TRIM26   | 1      | 0                      | 0.227                | 0                      |
| 8                   | DERL2    | 5      | 0.002                  | 0.294                | 0.7                    | 5                      | ZFAND6   | 1      | 0                      | 0.264                | 0                      |
| 8                   | NPLOC4   | 5      | 0                      | 0.242                | 0.4                    | 5                      | EDARADD  | 1      | 0                      | 0.264                | 0                      |
| 8                   | ERLEC1   | 4      | 0                      | 0.294                | 1                      | 5                      | RNF138   | 1      | 0                      | 0.227                | 0                      |
| 8                   | SEL1L    | 4      | 0                      | 0.294                | 1                      | 5                      | PDZRN3   | 1      | 0                      | 0.227                | 0                      |
| 8                   | SVIP     | 3      | 0                      | 0.242                | 0.667                  | 5                      | UBE2E3   | 1      | 0                      | 0.185                | 0                      |
| 8                   | YOD1     | 3      | 0                      | 0.242                | 0.667                  | 5                      | RNF125   | 1      | 0                      | 0.227                | 0                      |
| 8                   | UBE2J1   | 3      | 0                      | 0.242                | 0.667                  | 5                      | MID2     | 1      | 0                      | 0.227                | 0                      |
| 8                   | UBXN8    | 2      | 0                      | 0.242                | 1                      | 5                      | DZIP3    | 1      | 0                      | 0.227                | 0                      |
| 8                   | UBXN6    | 2      | 0                      | 0.242                | 1                      | 5                      | TNFSF4   | 1      | 0                      | 0.264                | 0                      |
| 8                   | UFD1L    | 2      | 0                      | 0.242                | 1                      | 5                      | RNF151   | 1      | 0                      | 0.227                | 0                      |
| 8                   | RNF19A   | 1      | 0                      | 0.242                | 0                      | 5                      | MYLIP    | 1      | 0                      | 0.227                | 0                      |
| 8                   | CDKN2AIP | 1      | 0                      | 0.242                | 0                      | 6                      | MAPK1    | 25     | 0.168                  | 0.357                | 0.1                    |
| 8                   | VCPIP1   | 1      | 0                      | 0.242                | 0                      | 6                      | MAPK3    | 20     | 0.025                  | 0.333                | 0.137                  |
| 8                   | UBXN2B   | 1      | 0                      | 0.242                | 0                      | 6                      | STAT1    | 17     | 0.084                  | 0.349                | 0.029                  |
| 8                   | UBXN2A   | 1      | 0                      | 0.242                | 0                      | 6                      | SI00A12  | 3      | 0                      | 0.3                  | 1                      |
| 8                   | UBXN1    | 1      | 0                      | 0.242                | 0                      | 6                      | PEA15    | 2      | 0                      | 0.264                | 1                      |
| 8                   | MDN1     | 1      | 0                      | 0.242                | 0                      | 6                      | PGF      | 2      | 0                      | 0.291                | 0                      |
| 8                   | RNF19B   | 1      | 0                      | 0.242                | 0                      | 6                      | PLA2G5   | 2      | 0                      | 0.264                | 1                      |
| 9                   | RPS3     | 13     | 0.049                  | 0.307                | 0.538                  | 6                      | PLA2G6   | 2      | 0                      | 0.264                | 1                      |
| 9                   | RPL7     | 11     | 0.007                  | 0.27                 | 0.782                  | 6                      | PLA1A    | 2      | 0                      | 0.264                | 1                      |
| 9                   | RPL9     | 11     | 0.007                  | 0.27                 | 0.782                  | 6                      | PTPN7    | 2      | 0                      | 0.264                | 1                      |
| 9                   | RPS21    | 10     | 0                      | 0.238                | 0.933                  | 6                      | DUSP5    | 2      | 0                      | 0.264                | 1                      |
| 9                   | RPL12    | 10     | 0                      | 0.238                | 0.933                  | 6                      | PLA2G2F  | 2      | 0                      | 0.264                | 1                      |
| 9                   | RPL35    | 10     | 0                      | 0.238                | 0.933                  | 6                      | HERC6    | 2      | 0.005                  | 0.26                 | 0                      |
| 9                   | RPL8     | 10     | 0                      | 0.238                | 0.933                  | 6                      | CROCC    | 2      | 0                      | 0.264                | 1                      |
| 9                   | RPS15    | 9      | 0                      | 0.238                | 1                      | 6                      | DUSP7    | 2      | 0                      | 0.264                | 1                      |
| 9                   | RPL26L1  | 9      | 0                      | 0.238                | 1                      | 6                      | VRK3     | 2      | 0                      | 0.264                | 1                      |
| 9                   | RPL3     | 9      | 0                      | 0.238                | 1                      | 6                      | DUSP16   | 2      | 0                      | 0.264                | 1                      |
| 9                   | RPL10L   | 7      | 0                      | 0.238                | 1                      | 6                      | BST2     | 1      | 0                      | 0.259                | 0                      |
| 9                   | SLC20A2  | 1      | 0                      | 0.235                | 0                      | 6                      | HERC3    | 1      | 0                      | 0.206                | 0                      |
| 9                   | TXNL4B   | 1      | 0                      | 0.235                | 0                      | 6                      | PNPT1    | 1      | 0                      | 0.259                | 0                      |
| 10                  | RBX1     | 22     | 0.08                   | 0.354                | 0.121                  | 6                      | POR      | 1      | 0                      | 0.259                | 0                      |
| 10                  | KLHL9    | 3      | 0                      | 0.262                | 0.667                  | 6                      | NNMT     | 1      | 0                      | 0.259                | 0                      |
| 10                  | KLHL21   | 2      | 0                      | 0.262                | 1                      | 6                      | CMTM3    | 1      | 0                      | 0.264                | 0                      |
| 10                  | KLHL13   | 2      | 0                      | 0.262                | 1                      | 6                      | LY6E     | 1      | 0                      | 0.259                | 0                      |
| 10                  | ASB16    | 1      | 0                      | 0.262                | 0                      | 6                      | OAS1     | 1      | 0                      | 0.259                | 0                      |
| 10                  | ZC3HC1   | 1      | 0                      | 0.262                | 0                      | 7                      | PRKAB2   | 22     | 0.084                  | 0.286                | 0.333                  |
| 10                  | FBXW2    | 1      | 0                      | 0.262                | 0                      | 7                      | PRKAA1   | 20     | 0.012                  | 0.241                | 0.405                  |
| 10                  | ASB13    | 1      | 0                      | 0.262                | 0                      | 7                      | PRKAB1   | 19     | 0.018                  | 0.257                | 0.45                   |
| 10                  | FBXL12   | 1      | 0                      | 0.262                | 0                      | 7                      | PRKAA2   | 18     | 0.002                  | 0.241                | 0.503                  |
| 10                  | ENC1     | 1      | 0                      | 0.262                | 0                      | 7                      | PRKAG2   | 18     | 0.002                  | 0.241                | 0.503                  |
| 10                  | FBXO33   | 1      | 0                      | 0.262                | 0                      | 7                      | PRKAG1   | 18     | 0.002                  | 0.241                | 0.503                  |
| 10                  | ASB18    | 1      | 0                      | 0.262                | 0                      | 7                      | ADIPOR1  | 8      | 0                      | 0.23                 | 0.964                  |

| Liver of db/db mice |        |        |                        |                      |                        | HepG2 treated with ESB |          |        |                        |                      |                        |
|---------------------|--------|--------|------------------------|----------------------|------------------------|------------------------|----------|--------|------------------------|----------------------|------------------------|
| Module              | Symbol | Degree | Betweenness Centrality | Closeness Centrality | Clustering Coefficient | Module                 | Symbol   | Degree | Betweenness Centrality | Closeness Centrality | Clustering Coefficient |
| 10                  | CUL4B  | 1      | 0                      | 0.262                | 0                      | 7                      | PFKFB4   | 7      | 0.019                  | 0.261                | 0.714                  |
| 11                  | RING1  | 10     | 0.013                  | 0.214                | 0.333                  | 7                      | CAMKK1   | 7      | 0                      | 0.23                 | 1                      |
| 11                  | RNF2   | 10     | 0.013                  | 0.214                | 0.333                  | 7                      | CAMKK2   | 7      | 0                      | 0.23                 | 1                      |
| 11                  | BMI1   | 6      | 0.001                  | 0.214                | 0.733                  | 7                      | G6PC     | 6      | 0                      | 0.23                 | 1                      |
| 11                  | CBX7   | 6      | 0.045                  | 0.261                | 0.533                  | 7                      | PFKFB2   | 6      | 0                      | 0.23                 | 1                      |
| 11                  | SCMH1  | 5      | 0.017                  | 0.237                | 0.6                    | 7                      | G6PC3    | 6      | 0                      | 0.23                 | 1                      |
| 11                  | PCGF6  | 4      | 0                      | 0.209                | 1                      | 7                      | AGRP     | 6      | 0                      | 0.23                 | 1                      |
| 11                  | PHC1   | 4      | 0                      | 0.194                | 1                      | 7                      | EEF2K    | 6      | 0                      | 0.23                 | 1                      |
| 11                  | PCGF5  | 3      | 0                      | 0.208                | 1                      | 7                      | G6PC2    | 6      | 0                      | 0.23                 | 1                      |
| 11                  | TCEA3  | 2      | 0                      | 0.177                | 1                      | 7                      | PFKFB3   | 6      | 0                      | 0.23                 | 1                      |
| 11                  | EPC2   | 2      | 0                      | 0.177                | 1                      | 7                      | MLYCD    | 6      | 0                      | 0.23                 | 1                      |
| 11                  | COMMD3 | 1      | 0                      | 0.177                | 0                      | 7                      | PFKFB1   | 6      | 0                      | 0.23                 | 1                      |
| 11                  | SCML2  | 1      | 0                      | 0.177                | 0                      | 7                      | MAP3K15  | 1      | 0                      | 0.223                | 0                      |
| 12                  | TPR    | 12     | 0.087                  | 0.344                | 0.485                  | 7                      | GRN      | 1      | 0                      | 0.223                | 0                      |
| 12                  | NUPL1  | 10     | 0.011                  | 0.294                | 0.667                  | 7                      | SLC25A13 | 1      | 0                      | 0.195                | 0                      |
| 12                  | NUP93  | 9      | 0.006                  | 0.259                | 0.778                  | 7                      | DAO      | 1      | 0                      | 0.223                | 0                      |
| 12                  | SNUPN  | 8      | 0                      | 0.259                | 1                      | 7                      | PTPLAD1  | 1      | 0                      | 0.195                | 0                      |
| 12                  | NUP210 | 8      | 0                      | 0.259                | 1                      | 8                      | RPA2     | 20     | 0.077                  | 0.269                | 0.211                  |
| 12                  | NUP50  | 8      | 0                      | 0.259                | 1                      | 8                      | RPA3     | 13     | 0                      | 0.213                | 0.295                  |
| 12                  | NUP188 | 8      | 0                      | 0.259                | 1                      | 8                      | RAD17    | 8      | 0.006                  | 0.256                | 0.536                  |
| 12                  | NUP88  | 8      | 0                      | 0.259                | 1                      | 8                      | TOPBP1   | 7      | 0.004                  | 0.256                | 0.667                  |
| 12                  | POM121 | 8      | 0                      | 0.259                | 1                      | 8                      | RPA4     | 7      | 0                      | 0.213                | 0.714                  |
| 12                  | ANO4   | 1      | 0                      | 0.206                | 0                      | 8                      | FANCG    | 7      | 0                      | 0.213                | 0.619                  |
|                     |        |        |                        |                      |                        | 8                      | FANCC    | 6      | 0                      | 0.212                | 0.8                    |
|                     |        |        |                        |                      |                        | 8                      | RMI1     | 6      | 0                      | 0.212                | 0.6                    |
|                     |        |        |                        |                      |                        | 8                      | MCM10    | 6      | 0.003                  | 0.23                 | 0.667                  |
|                     |        |        |                        |                      |                        | 8                      | FANCD2   | 5      | 0                      | 0.212                | 1                      |
|                     |        |        |                        |                      |                        | 8                      | DBF4     | 5      | 0                      | 0.212                | 1                      |
|                     |        |        |                        |                      |                        | 8                      | PRIM1    | 5      | 0                      | 0.212                | 1                      |
|                     |        |        |                        |                      |                        | 8                      | ERCC1    | 4      | 0                      | 0.212                | 0.667                  |
|                     |        |        |                        |                      |                        | 8                      | TOP3B    | 4      | 0                      | 0.212                | 1                      |
|                     |        |        |                        |                      |                        | 8                      | SMARCAL1 | 4      | 0.056                  | 0.3                  | 0.5                    |
|                     |        |        |                        |                      |                        | 8                      | XPC      | 3      | 0                      | 0.212                | 1                      |
|                     |        |        |                        |                      |                        | 8                      | MND1     | 3      | 0                      | 0.212                | 1                      |
|                     |        |        |                        |                      |                        | 8                      | PSMC3IP  | 3      | 0                      | 0.212                | 1                      |
|                     |        |        |                        |                      |                        | 8                      | HSBP1    | 2      | 0                      | 0.212                | 1                      |
|                     |        |        |                        |                      |                        | 9                      | CDH3     | 14     | 0                      | 0.286                | 0.462                  |
|                     |        |        |                        |                      |                        | 9                      | CELSR3   | 10     | 0.002                  | 0.31                 | 0.822                  |
|                     |        |        |                        |                      |                        | 9                      | CDH15    | 10     | 0                      | 0.285                | 0.844                  |
|                     |        |        |                        |                      |                        | 9                      | PCDH11X  | 9      | 0                      | 0.285                | 1                      |
|                     |        |        |                        |                      |                        | 9                      | PCDHB12  | 9      | 0                      | 0.285                | 1                      |
|                     |        |        |                        |                      |                        | 9                      | PCDHB11  | 9      | 0                      | 0.285                | 1                      |
|                     |        |        |                        |                      |                        | 9                      | PCDHB10  | 9      | 0                      | 0.285                | 1                      |
|                     |        |        |                        |                      |                        | 9                      | PCDHB4   | 9      | 0                      | 0.285                | 1                      |
|                     |        |        |                        |                      |                        | 9                      | PCDHGA2  | 9      | 0                      | 0.285                | 1                      |
|                     |        |        |                        |                      |                        | 9                      | MMP21    | 2      | 0                      | 0.283                | 1                      |
|                     |        |        |                        |                      |                        | 9                      | CBLL1    | 2      | 0                      | 0.283                | 1                      |
|                     |        |        |                        |                      |                        | 9                      | PKP4     | 2      | 0                      | 0.283                | 1                      |
|                     |        |        |                        |                      |                        | 9                      | WNT3     | 2      | 0                      | 0.283                | 1                      |
|                     |        |        |                        |                      |                        | 10                     | ARF1     | 13     | 0.053                  | 0.312                | 0.231                  |
|                     |        |        |                        |                      |                        | 10                     | ARF3     | 7      | 0.001                  | 0.252                | 0.667                  |
|                     |        |        |                        |                      |                        | 10                     | ARF5     | 7      | 0.001                  | 0.252                | 0.667                  |
|                     |        |        |                        |                      |                        | 10                     | RAB25    | 6      | 0                      | 0.252                | 0.8                    |
|                     |        |        |                        |                      |                        | 10                     | TUBB8    | 5      | 0.007                  | 0.242                | 0.6                    |
|                     |        |        |                        |                      |                        | 10                     | RAB2B    | 4      | 0                      | 0.239                | 1                      |
|                     |        |        |                        |                      |                        | 10                     | ARFGAP3  | 4      | 0.002                  | 0.294                | 0.5                    |
|                     |        |        |                        |                      |                        | 10                     | COPA     | 3      | 0                      | 0.24                 | 0.667                  |
|                     |        |        |                        |                      |                        | 10                     | CADPS2   | 3      | 0                      | 0.238                | 1                      |
|                     |        |        |                        |                      |                        | 10                     | ARCN1    | 2      | 0                      | 0.238                | 1                      |

| Liver of db/db mice |        |        |                        |                      |                        | HepG2 treated with ESB |          |        |                        |                      |                        |
|---------------------|--------|--------|------------------------|----------------------|------------------------|------------------------|----------|--------|------------------------|----------------------|------------------------|
| Module              | Symbol | Degree | Betweenness Centrality | Closeness Centrality | Clustering Coefficient | Module                 | Symbol   | Degree | Betweenness Centrality | Closeness Centrality | Clustering Coefficient |
|                     |        |        |                        |                      |                        | 10                     | GRASP    | 1      | 0                      | 0.238                | 0                      |
|                     |        |        |                        |                      |                        | 11                     | DYNLL2   | 11     | 0.052                  | 0.229                | 0.655                  |
|                     |        |        |                        |                      |                        | 11                     | IFT81    | 10     | 0.001                  | 0.187                | 0.978                  |
|                     |        |        |                        |                      |                        | 11                     | IFT80    | 10     | 0.001                  | 0.187                | 0.978                  |
|                     |        |        |                        |                      |                        | 11                     | WDR19    | 10     | 0.001                  | 0.187                | 0.978                  |
|                     |        |        |                        |                      |                        | 11                     | WDR60    | 10     | 0.001                  | 0.187                | 0.978                  |
|                     |        |        |                        |                      |                        | 11                     | DYNC2L11 | 10     | 0.001                  | 0.187                | 0.978                  |
|                     |        |        |                        |                      |                        | 11                     | TTC26    | 10     | 0.001                  | 0.187                | 0.978                  |
|                     |        |        |                        |                      |                        | 11                     | KIF3C    | 10     | 0.001                  | 0.187                | 0.978                  |
|                     |        |        |                        |                      |                        | 11                     | WDR35    | 10     | 0.001                  | 0.187                | 0.978                  |
|                     |        |        |                        |                      |                        | 11                     | TTC30B   | 10     | 0.001                  | 0.187                | 0.978                  |
|                     |        |        |                        |                      |                        | 11                     | DYNLRB1  | 9      | 0                      | 0.158                | 1                      |
|                     |        |        |                        |                      |                        | 12                     | PCBP2    | 10     | 0.048                  | 0.3                  | 0.467                  |
|                     |        |        |                        |                      |                        | 12                     | PCBP1    | 9      | 0.007                  | 0.233                | 0.639                  |
|                     |        |        |                        |                      |                        | 12                     | PTBP1    | 8      | 0.002                  | 0.232                | 0.821                  |
|                     |        |        |                        |                      |                        | 12                     | SNRPA    | 8      | 0.002                  | 0.232                | 0.821                  |
|                     |        |        |                        |                      |                        | 12                     | PCF11    | 7      | 0                      | 0.232                | 1                      |
|                     |        |        |                        |                      |                        | 12                     | PLRG1    | 7      | 0                      | 0.232                | 1                      |
|                     |        |        |                        |                      |                        | 12                     | EFTUD2   | 7      | 0                      | 0.232                | 1                      |
|                     |        |        |                        |                      |                        | 12                     | SNRPA1   | 7      | 0                      | 0.232                | 1                      |
|                     |        |        |                        |                      |                        | 12                     | RALY     | 3      | 0                      | 0.189                | 1                      |
|                     |        |        |                        |                      |                        | 12                     | RBM11    | 1      | 0                      | 0.189                | 0                      |

Supplementary Table S4. The biological functions associated with each module.

<List of GO terms>

| Liver of db/db mice |                                                                                               |          | HepG2 treated with ESB |                                                                                                                       |          |
|---------------------|-----------------------------------------------------------------------------------------------|----------|------------------------|-----------------------------------------------------------------------------------------------------------------------|----------|
| Module              | GO                                                                                            | FDR      | Module                 | GO                                                                                                                    | FDR      |
| 0                   | Toll signaling pathway                                                                        | 1.43E-04 | 0                      | Rho protein signal transduction                                                                                       | 1.43E-04 |
| 0                   | Positive regulation of NF-kB transcription factor activity                                    | 1.67E-04 | 0                      | Regulation of phosphatidylinositol 3-kinase activity                                                                  | 1.67E-04 |
| 0                   | Toll-like receptor signaling pathway                                                          | 2.00E-04 | 0                      | Positive regulation of Rho GTPase activity                                                                            | 2.00E-04 |
| 0                   | Toll-like receptor 2 signaling pathway                                                        | 2.31E-04 | 0                      | Regulation of respiratory burst                                                                                       | 2.22E-04 |
| 0                   | Negative regulation of NF-kB transcription factor activity                                    | 2.50E-04 | 0                      | Regulation of hydrogen peroxide metabolic process                                                                     | 2.22E-04 |
| 0                   | Negative regulation of type I interferon production                                           | 2.50E-04 | 0                      | Axon guidance                                                                                                         | 2.50E-04 |
| 0                   | Toll-like receptor 9 signaling pathway                                                        | 2.73E-04 | 0                      | GTP catabolic process                                                                                                 | 3.33E-04 |
| 0                   | Protein polyubiquitination                                                                    | 3.00E-04 | 0                      | Regulation of small GTPase mediated signal transduction                                                               | 5.00E-04 |
| 0                   | Toll-like receptor 10 signaling pathway                                                       | 3.33E-04 | 0                      | Rac protein signal transduction                                                                                       | 5.00E-04 |
| 0                   | Toll-like receptor 5 signaling pathway                                                        | 3.33E-04 | 0                      | Neuron remodeling                                                                                                     | 7.27E-04 |
| 0                   | Toll-like receptor TLR1:TLR2 signaling pathway                                                | 3.33E-04 | 0                      | Small GTPase mediated signal transduction                                                                             | 1.00E-03 |
| 0                   | Toll-like receptor TLR6:TLR2 signaling pathway                                                | 3.33E-04 | 0                      | Platelet activation                                                                                                   | 1.25E-03 |
| 0                   | MyD88-dependent toll-like receptor signaling pathway                                          | 1.00E-03 | 0                      | Dendrite morphogenesis                                                                                                | 2.46E-03 |
| 0                   | Toll-like receptor 4 signaling pathway                                                        | 1.40E-03 | 0                      | Positive regulation of Rac GTPase activity                                                                            | 2.67E-03 |
| 0                   | Response to lipopolysaccharide                                                                | 1.44E-03 | 0                      | Lamellipodium assembly                                                                                                | 2.79E-03 |
| 0                   | i-kB kinase/NF-kB cascade                                                                     | 1.50E-03 | 1                      | Positive regulation of mesenchymal cell proliferation                                                                 | 2.00E-04 |
| 0                   | DNA damage response, signal transduction by p53 class mediator resulting in cell cycle arrest | 4.82E-03 | 1                      | Cell fate commitment                                                                                                  | 2.50E-04 |
| 0                   | Positive regulation of osteoclast differentiation                                             | 7.74E-03 | 1                      | Lung induction                                                                                                        | 3.33E-04 |
| 0                   | Negative regulation of ubiquitin-protein ligase activity involved in mitotic cell cycle       | 8.17E-03 | 1                      | Canonical Wnt receptor signaling pathway                                                                              | 3.33E-04 |
| 0                   | Positive regulation of ubiquitin-protein ligase activity involved in mitotic cell cycle       | 9.19E-03 | 1                      | Neuron differentiation                                                                                                | 5.00E-04 |
| 0                   | Negative regulation of apoptotic process                                                      | 9.55E-03 | 1                      | Wnt receptor signaling pathway                                                                                        | 1.00E-03 |
| 1                   | Response to cytokine stimulus                                                                 | 3.85E-05 | 1                      | Inner ear morphogenesis                                                                                               | 1.57E-03 |
| 1                   | Positive regulation of acute inflammatory response                                            | 4.00E-05 | 1                      | Cellular response to retinoic acid                                                                                    | 3.75E-03 |
| 1                   | Defense response to virus                                                                     | 4.17E-05 | 1                      | Regulation of transcription from RNA polymerase II promoter involved in ventral spinal cord interneuron specification | 7.67E-03 |
| 1                   | JAK-STAT cascade                                                                              | 4.35E-05 | 2                      | Anaphase-promoting complex-dependent proteasomal ubiquitin-dependent protein catabolic process                        | 2.50E-04 |
| 1                   | Negative regulation of protein kinase activity                                                | 4.55E-05 | 2                      | DNA damage response, signal transduction by p53 class mediator resulting in cell cycle arrest                         | 3.33E-04 |
| 1                   | Negative regulation of insulin receptor signaling pathway                                     | 4.76E-05 | 2                      | Intracellular signal transduction                                                                                     | 5.00E-04 |
| 1                   | Humoral immune response                                                                       | 5.00E-05 | 2                      | Regulation of cellular amino acid metabolic process                                                                   | 6.00E-04 |
| 1                   | Leukemia inhibitory factor signaling pathway                                                  | 5.26E-05 | 2                      | Protein polyubiquitination                                                                                            | 8.33E-04 |
| 1                   | Regulation of growth                                                                          | 5.56E-05 | 2                      | Protein ubiquitination                                                                                                | 1.00E-03 |
| 1                   | Adaptive immune response                                                                      | 5.88E-05 | 2                      | Negative regulation of ubiquitin-protein ligase activity involved in mitotic cell cycle                               | 2.57E-03 |
| 1                   | Response to exogenous dsRNA                                                                   | 6.25E-05 | 2                      | Regulation of ubiquitin-protein ligase activity involved in mitotic cell cycle                                        | 3.73E-03 |
| 1                   | Type I interferon-mediated signaling pathway                                                  | 6.67E-05 | 2                      | Antigen processing and presentation of exogenous peptide antigen via MHC class I, TAP-dependent                       | 4.10E-03 |
| 1                   | B cell proliferation                                                                          | 7.14E-05 | 2                      | G1/S transition of mitotic cell cycle                                                                                 | 4.11E-03 |
| 1                   | Positive regulation of tyrosine phosphorylation of Stat3 protein                              | 7.69E-05 | 2                      | Positive regulation of ubiquitin-protein ligase activity involved in mitotic cell cycle                               | 4.50E-03 |
| 1                   | JAK-STAT cascade involved in growth hormone signaling pathway                                 | 8.33E-05 | 2                      | Antigen processing and presentation of exogenous peptide antigen via MHC class I                                      | 5.17E-03 |
| 1                   | Positive regulation of peptidyl-serine phosphorylation of STAT protein                        | 9.09E-05 | 3                      | Regulation of transcription, DNA-dependent                                                                            | 5.00E-04 |
| 1                   | T cell activation involved in immune response                                                 | 1.00E-04 | 3                      | Transcription, DNA-dependent                                                                                          | 1.00E-03 |
| 1                   | Regulation of MHC class I biosynthetic process                                                | 1.00E-04 | 4                      | Microtubule cytoskeleton organization                                                                                 | 3.33E-04 |
| 1                   | Natural killer cell activation involved in immune response                                    | 1.00E-04 | 4                      | G2/M transition of mitotic cell cycle                                                                                 | 5.00E-04 |



|   |                                                                      |          |  |    |                                                                                   |          |
|---|----------------------------------------------------------------------|----------|--|----|-----------------------------------------------------------------------------------|----------|
| 1 | Ciliary neurotrophic factor-mediated signaling pathway               | 1.43E-04 |  | 4  | Mitotic cell cycle                                                                | 5.00E-04 |
| 1 | Oncostatin-M-mediated signaling pathway                              | 1.43E-04 |  | 4  | Microtubule nucleation                                                            | 7.50E-04 |
| 1 | Positive regulation of tyrosine phosphorylation of Stat5 protein     | 1.85E-04 |  | 4  | Establishment of mitotic spindle orientation                                      | 8.00E-04 |
| 1 | B cell differentiation                                               | 2.00E-04 |  | 5  | Positive regulation of NF-kB transcription factor activity                        | 3.33E-04 |
| 1 | Regulation of type I interferon-mediated signaling pathway           | 2.50E-04 |  | 5  | Protein K48-linked ubiquitination                                                 | 5.00E-04 |
| 1 | Positive regulation of cell proliferation                            | 3.33E-04 |  | 5  | Protein ubiquitination                                                            | 1.00E-03 |
| 1 | Immune response                                                      | 4.29E-04 |  | 5  | Tumor necrosis factor-mediated signaling pathway                                  | 7.75E-03 |
| 1 | Negative regulation of JAK-STAT cascade                              | 5.00E-04 |  | 5  | Protein K63-linked ubiquitination                                                 | 8.20E-03 |
| 1 | Cytokine-mediated signaling pathway                                  | 1.00E-03 |  | 6  | Inactivation of MAPK activity                                                     | 5.33E-03 |
| 1 | Cell-cell signaling                                                  | 1.07E-03 |  | 6  | Phosphatidylcholine acyl-chain remodeling                                         | 7.00E-03 |
| 1 | Positive regulation of peptidyl-tyrosine phosphorylation             | 1.13E-03 |  | 6  | Peptidyl-tyrosine dephosphorylation                                               | 7.25E-03 |
| 1 | Protein ubiquitination                                               | 3.61E-03 |  | 6  | Phosphatidylethanolamine acyl-chain remodeling                                    | 1.00E-02 |
| 1 | Positive regulation of natural killer cell differentiation           | 6.97E-03 |  | 7  | Membrane organization                                                             | 6.25E-05 |
| 1 | Fat cell differentiation                                             | 7.30E-03 |  | 7  | Cell cycle arrest                                                                 | 6.67E-05 |
| 1 | Positive regulation of T cell proliferation                          | 8.29E-03 |  | 7  | Glucose metabolic process                                                         | 7.14E-05 |
| 2 | Positive regulation of transcription, DNA-dependent                  | 1.25E-04 |  | 7  | Carnitine shuttle                                                                 | 7.69E-05 |
| 2 | Fatty acid beta-oxidation                                            | 1.43E-04 |  | 7  | Glycolysis                                                                        | 8.33E-05 |
| 2 | Cellular lipid metabolic process                                     | 1.67E-04 |  | 7  | Regulation of fatty acid biosynthetic process                                     | 9.09E-05 |
| 2 | Stem cell maintenance                                                | 2.00E-04 |  | 7  | Insulin receptor signaling pathway                                                | 1.00E-04 |
| 2 | Long-chain fatty acid metabolic process                              | 2.50E-04 |  | 7  | Protein phosphorylation                                                           | 1.11E-04 |
| 2 | Transcription initiation from RNA polymerase II promoter             | 3.33E-04 |  | 7  | Carbohydrate phosphorylation                                                      | 1.25E-04 |
| 2 | Regulation of transcription from RNA polymerase II promoter          | 3.33E-04 |  | 7  | Small molecule metabolic process                                                  | 1.43E-04 |
| 2 | Intracellular steroid hormone receptor signaling pathway             | 5.00E-04 |  | 7  | Carbohydrate metabolic process                                                    | 1.67E-04 |
| 2 | Androgen receptor signaling pathway                                  | 1.00E-03 |  | 7  | Gluconeogenesis                                                                   | 2.00E-04 |
| 2 | Labyrinthine layer morphogenesis                                     | 3.60E-03 |  | 7  | Dephosphorylation                                                                 | 2.50E-04 |
| 2 | Bile acid metabolic process                                          | 6.00E-03 |  | 7  | Fructose metabolic process                                                        | 3.33E-04 |
| 2 | Intracellular receptor mediated signaling pathway                    | 7.67E-03 |  | 7  | Fructose 2,6-bisphosphate metabolic process                                       | 5.00E-04 |
| 2 | Gene expression                                                      | 8.50E-03 |  | 7  | Glucose-6-phosphate transport                                                     | 9.41E-04 |
| 2 | Carnitine metabolic process                                          | 8.54E-03 |  | 7  | Energy reserve metabolic process                                                  | 9.44E-04 |
| 3 | Insulin receptor signaling pathway                                   | 5.00E-04 |  | 7  | Fatty acid biosynthetic process                                                   | 1.00E-03 |
| 3 | Transmembrane receptor protein tyrosine kinase signaling pathway     | 1.00E-03 |  | 7  | Positive regulation of glucokinase activity                                       | 2.21E-03 |
| 3 | Ras protein signal transduction                                      | 6.33E-03 |  | 7  | Hexose transport                                                                  | 2.60E-03 |
| 4 | Apoptotic signaling pathway                                          | 2.00E-04 |  | 7  | Regulation of glycolysis                                                          | 2.81E-03 |
| 4 | Positive regulation of GTPase activity                               | 2.50E-04 |  | 7  | Cellular lipid metabolic process                                                  | 3.36E-03 |
| 4 | Positive regulation of Rho GTPase activity                           | 3.33E-04 |  | 7  | Glucose 6-phosphate metabolic process                                             | 3.48E-03 |
| 4 | Small GTPase mediated signal transduction                            | 5.00E-04 |  | 7  | Glucose transport                                                                 | 5.33E-03 |
| 4 | Regulation of small GTPase mediated signal transduction              | 5.00E-04 |  | 8  | G1/S transition of mitotic cell cycle                                             | 2.50E-04 |
| 5 | Negative regulation of transcription from RNA polymerase II promoter | 2.50E-04 |  | 8  | Nucleotide-excision repair                                                        | 3.33E-04 |
| 5 | Positive regulation of transcription from RNA polymerase II promoter | 3.33E-04 |  | 8  | Nucleotide-excision repair, DNA damage removal                                    | 4.00E-04 |
| 5 | Endocrine pancreas development                                       | 5.00E-04 |  | 8  | DNA replication                                                                   | 5.00E-04 |
| 5 | Transcription, DNA-dependent                                         | 1.00E-03 |  | 8  | DNA repair                                                                        | 1.00E-03 |
| 5 | Pancreas development                                                 | 2.20E-03 |  | 8  | DNA recombinase assembly                                                          | 2.17E-03 |
| 6 | Mitosis                                                              | 3.33E-04 |  | 9  | Homophilic cell adhesion                                                          | 1.00E-03 |
| 6 | Cell division                                                        | 5.00E-04 |  | 9  | Calcium-dependent cell-cell adhesion                                              | 1.00E-03 |
| 6 | Mitotic cell cycle                                                   | 1.00E-03 |  | 9  | Synapse assembly                                                                  | 3.67E-03 |
| 7 | Phosphatidic acid biosynthetic process                               | 1.11E-04 |  | 9  | Cell adhesion                                                                     | 7.00E-03 |
| 7 | Phospholipid metabolic process                                       | 1.25E-04 |  | 10 | Retrograde vesicle-mediated transport, Golgi to ER                                | 2.50E-04 |
| 7 | Phosphatidylinositol acyl-chain remodeling                           | 1.43E-04 |  | 10 | GTP catabolic process                                                             | 3.33E-04 |
| 7 | Phosphatidylserine acyl-chain remodeling                             | 1.43E-04 |  | 10 | Intracellular protein transport                                                   | 5.00E-04 |
| 7 | Phosphatidylglycerol acyl-chain remodeling                           | 1.43E-04 |  | 10 | COPI coating of Golgi vesicle                                                     | 1.00E-03 |
| 7 | Glycerophospholipid biosynthetic process                             | 2.50E-04 |  | 11 | Intraflagellar transport                                                          | 5.00E-04 |
| 7 | Lipid catabolic process                                              | 3.33E-04 |  | 11 | Cilium assembly                                                                   | 1.00E-03 |
| 7 | Phosphatidylcholine acyl-chain remodeling                            | 5.00E-04 |  | 11 | Metabolic process                                                                 | 4.80E-03 |
| 7 | Phosphatidylethanolamine acyl-chain remodeling                       | 1.00E-03 |  | 11 | Antigen processing and presentation of exogenous peptide antigen via MHC class II | 6.00E-03 |
| 7 | Negative regulation of ERK1 and ERK2 cascade                         | 1.50E-03 |  | 11 | Intraflagellar retrograde transport                                               | 6.33E-03 |

|    |                                                                     |          |    |                                        |          |
|----|---------------------------------------------------------------------|----------|----|----------------------------------------|----------|
| 8  | ER-associated protein catabolic process                             | 1.00E-03 | 12 | RNA splicing                           | 5.00E-04 |
| 8  | nuclear envelope reassembly                                         | 4.00E-03 | 12 | gene expression                        | 6.67E-04 |
| 8  | membrane fusion                                                     | 4.67E-03 | 12 | nuclear mRNA splicing, via spliceosome | 1.00E-03 |
| 8  | protein K11-linked deubiquitination                                 | 6.25E-03 |    |                                        |          |
| 8  | Golgi organization                                                  | 8.80E-03 |    |                                        |          |
| 9  | gene expression                                                     | 7.69E-05 |    |                                        |          |
| 9  | cellular protein metabolic process                                  | 8.33E-05 |    |                                        |          |
| 9  | viral reproduction                                                  | 9.09E-05 |    |                                        |          |
| 9  | RNA metabolic process                                               | 1.00E-04 |    |                                        |          |
| 9  | mRNA metabolic process                                              | 1.11E-04 |    |                                        |          |
| 9  | translational initiation                                            | 1.25E-04 |    |                                        |          |
| 9  | nuclear-transcribed mRNA catabolic process, nonsense-mediated decay | 1.43E-04 |    |                                        |          |
| 9  | viral infectious cycle                                              | 1.67E-04 |    |                                        |          |
| 9  | SRP-dependent cotranslational protein targeting to membrane         | 2.00E-04 |    |                                        |          |
| 9  | translational elongation                                            | 2.50E-04 |    |                                        |          |
| 9  | translational termination                                           | 3.33E-04 |    |                                        |          |
| 9  | viral transcription                                                 | 5.00E-04 |    |                                        |          |
| 9  | translation                                                         | 1.00E-03 |    |                                        |          |
| 10 | protein ubiquitination                                              | 1.00E-03 |    |                                        |          |
| 11 | transcription, DNA-dependent                                        | 1.00E-03 |    |                                        |          |
| 12 | protein import into nucleus                                         | 7.69E-05 |    |                                        |          |
| 12 | small molecule metabolic process                                    | 8.33E-05 |    |                                        |          |
| 12 | protein transport                                                   | 9.09E-05 |    |                                        |          |
| 12 | viral reproduction                                                  | 1.00E-04 |    |                                        |          |
| 12 | mitotic cell cycle                                                  | 1.11E-04 |    |                                        |          |
| 12 | carbohydrate metabolic process                                      | 1.25E-04 |    |                                        |          |
| 12 | mRNA transport                                                      | 1.43E-04 |    |                                        |          |
| 12 | cytokine-mediated signaling pathway                                 | 1.67E-04 |    |                                        |          |
| 12 | transmembrane transport                                             | 2.00E-04 |    |                                        |          |
| 12 | regulation of glucose transport                                     | 2.50E-04 |    |                                        |          |
| 12 | mitotic nuclear envelope disassembly                                | 2.50E-04 |    |                                        |          |
| 12 | glucose transport                                                   | 2.50E-04 |    |                                        |          |
| 12 | hexose transport                                                    | 2.50E-04 |    |                                        |          |
| 12 | nuclear pore complex assembly                                       | 1.64E-03 |    |                                        |          |
|    |                                                                     |          |    |                                        |          |

<List of Pathways>

| Liver of db/db mice |                                              |          | HepG2 treated with ESB |                                           |          |
|---------------------|----------------------------------------------|----------|------------------------|-------------------------------------------|----------|
| Module              | Pathway                                      | FDR      | Module                 | Pathway                                   | FDR      |
| 0                   | Proteasome                                   | 1.25E-04 | 0                      | Chronic myeloid leukemia                  | 5.88E-05 |
| 0                   | NF-kB signaling pathway                      | 1.14E-03 | 0                      | Platelet activation                       | 6.67E-05 |
| 0                   | Neurotrophin signaling pathway               | 4.04E-03 | 0                      | Rap1 signaling pathway                    | 7.14E-05 |
| 1                   | RIG-I-like receptor signaling pathway        | 1.11E-04 | 0                      | ErbB signaling pathway                    | 9.52E-05 |
| 1                   | Autoimmune thyroid disease                   | 1.25E-04 | 0                      | Proteoglycans in cancer                   | 1.05E-04 |
| 1                   | Hematopoietic cell lineage                   | 1.67E-04 | 0                      | T cell receptor signaling pathway         | 1.11E-04 |
| 1                   | Regulation of autophagy                      | 1.82E-04 | 0                      | B cell receptor signaling pathway         | 1.25E-04 |
| 1                   | PI3K-Akt signaling pathway                   | 2.00E-04 | 0                      | Osteoclast differentiation                | 1.82E-04 |
| 1                   | Prolactin signaling pathway                  | 2.50E-04 | 0                      | Axon guidance                             | 2.00E-04 |
| 1                   | Jak-STAT signaling pathway                   | 5.00E-04 | 0                      | Colorectal cancer                         | 2.61E-04 |
| 1                   | Cytokine-cytokine receptor interaction       | 5.00E-04 | 0                      | Leukocyte transendothelial migration      | 3.33E-04 |
| 1                   | Type II diabetes mellitus                    | 5.39E-04 | 0                      | Fc epsilon RI signaling pathway           | 3.46E-04 |
| 1                   | Herpes simplex infection                     | 9.33E-04 | 0                      | JAK-STAT signaling pathway                | 4.82E-04 |
| 1                   | Cytosolic DNA-sensing pathway                | 1.39E-03 | 0                      | Bacterial invasion of epithelial cells    | 5.00E-04 |
| 1                   | Measles                                      | 1.60E-03 | 0                      | Pathways in cancer                        | 6.33E-04 |
| 1                   | Hepatitis C                                  | 1.63E-03 | 0                      | Measles                                   | 1.03E-03 |
| 1                   | Influenza A                                  | 3.71E-03 | 0                      | Natural killer cell mediated cytotoxicity | 1.03E-03 |
| 1                   | Tuberculosis                                 | 3.92E-03 | 0                      | Insulin signaling pathway                 | 1.18E-03 |
| 1                   | Toll-like receptor signaling pathway         | 5.73E-03 | 0                      | Chemokine signaling pathway               | 1.18E-03 |
| 1                   | Intestinal immune network for IgA production | 6.72E-03 | 0                      | VEGF signaling pathway                    | 1.23E-03 |
| 2                   | Fatty acid metabolism                        | 1.11E-04 | 0                      | Renal cell carcinoma                      | 1.70E-03 |
| 2                   | Fatty acid degradation                       | 1.25E-04 | 0                      | Pancreatic cancer                         | 1.70E-03 |
| 2                   | Thyroid hormone signaling pathway            | 1.43E-04 | 0                      | Melanoma                                  | 2.30E-03 |
| 2                   | Adipocytokine signaling pathway              | 1.67E-04 | 0                      | Cholinergic synapse                       | 2.51E-03 |

|    |                                             |          |   |                                                          |          |
|----|---------------------------------------------|----------|---|----------------------------------------------------------|----------|
| 2  | Fatty acid biosynthesis                     | 2.14E-04 | 0 | Adherens junction                                        | 2.53E-03 |
| 2  | PPAR signaling pathway                      | 2.50E-04 | 0 | Aldosterone-regulated sodium reabsorption                | 2.55E-03 |
| 3  | Ras signaling pathway                       | 5.00E-04 | 0 | Regulation of actin cytoskeleton                         | 2.57E-03 |
| 3  | Chronic myeloid leukemia                    | 9.50E-04 | 0 | Neurotrophin signaling pathway                           | 3.20E-03 |
| 3  | T cell receptor signaling pathway           | 2.14E-03 | 0 | Ras signaling pathway                                    | 3.26E-03 |
| 3  | Neurotrophin signaling pathway              | 3.09E-03 | 0 | Phosphatidylinositol signaling system                    | 3.41E-03 |
| 3  | Natural killer cell mediated cytotoxicity   | 4.44E-03 | 0 | Carbohydrate digestion and absorption                    | 3.46E-03 |
| 3  | Glioma                                      | 6.78E-03 | 0 | Type II diabetes mellitus                                | 4.05E-03 |
| 3  | Melanoma                                    | 8.47E-03 | 0 | Progesterone-mediated oocyte maturation                  | 4.80E-03 |
| 3  | Prolactin signaling pathway                 | 8.67E-03 | 0 | Endometrial cancer                                       | 4.94E-03 |
| 7  | Glycerophospholipid metabolism              | 1.25E-04 | 0 | Fc gamma R-mediated phagocytosis                         | 5.06E-03 |
| 7  | Vascular smooth muscle contraction          | 1.67E-04 | 0 | cAMP signaling pathway                                   | 5.86E-03 |
| 7  | Arachidonic acid metabolism                 | 2.00E-04 | 0 | Non-small cell lung cancer                               | 5.90E-03 |
| 7  | Pancreatic secretion                        | 2.00E-04 | 0 | Acute myeloid leukemia                                   | 6.16E-03 |
| 7  | Ras signaling pathway                       | 2.50E-04 | 0 | Focal adhesion                                           | 6.35E-03 |
| 7  | Ether lipid metabolism                      | 3.33E-04 | 0 | Estrogen signaling pathway                               | 6.42E-03 |
| 7  | Linoleic acid metabolism                    | 5.00E-04 | 0 | Choline metabolism in cancer                             | 6.42E-03 |
| 7  | alpha-Linolenic acid metabolism             | 1.00E-03 | 0 | mTOR signaling pathway                                   | 6.85E-03 |
| 7  | MAPK signaling pathway                      | 2.00E-03 | 0 | Chagas disease (American trypanosomiasis)                | 7.22E-03 |
| 7  | Fc gamma R-mediated phagocytosis            | 7.62E-03 | 0 | HIF-1 signaling pathway                                  | 7.48E-03 |
| 7  | Dorso-ventral axis formation                | 8.26E-03 | 0 | Toll-like receptor signaling pathway                     | 7.48E-03 |
| 7  | Thyroid cancer                              | 8.69E-03 | 0 | Oxytocin signaling pathway                               | 7.60E-03 |
| 7  | Retrograde endocannabinoid signaling        | 8.89E-03 | 0 | Glioma                                                   | 8.23E-03 |
| 7  | TNF signaling pathway                       | 9.30E-03 | 0 | Central carbon metabolism in cancer                      | 8.92E-03 |
| 8  | Protein processing in endoplasmic reticulum | 1.00E-03 | 0 | cGMP-PKG signaling pathway                               | 9.06E-03 |
| 9  | Ribosome                                    | 1.67E-04 | 1 | Proteoglycans in cancer                                  | 7.69E-05 |
| 10 | Ubiquitin mediated proteolysis              | 1.00E-03 | 1 | Pathways in cancer                                       | 8.33E-05 |
| 10 | Nucleotide excision repair                  | 7.33E-03 | 1 | HTLV-I infection                                         | 9.09E-05 |
| 12 | RNA transport                               | 1.67E-04 | 1 | Melanogenesis                                            | 1.11E-04 |
|    |                                             |          | 1 | Hippo signaling pathway                                  | 1.43E-04 |
|    |                                             |          | 1 | Hedgehog signaling pathway                               | 1.67E-04 |
|    |                                             |          | 1 | Signaling pathways regulating pluripotency of stem cells | 2.00E-04 |
|    |                                             |          | 1 | Basal cell carcinoma                                     | 5.00E-04 |
|    |                                             |          | 1 | Wnt signaling pathway                                    | 1.00E-03 |
|    |                                             |          | 2 | Proteasome                                               | 5.00E-04 |
|    |                                             |          | 5 | Protein processing in endoplasmic reticulum              | 6.00E-03 |
|    |                                             |          | 6 | Vascular smooth muscle contraction                       | 5.00E-04 |
|    |                                             |          | 6 | Ras signaling pathway                                    | 1.00E-03 |
|    |                                             |          | 6 | Linoleic acid metabolism                                 | 1.10E-03 |
|    |                                             |          | 6 | alpha-Linolenic acid metabolism                          | 1.43E-03 |
|    |                                             |          | 6 | MAPK signaling pathway                                   | 1.60E-03 |
|    |                                             |          | 6 | Ether lipid metabolism                                   | 2.29E-03 |
|    |                                             |          | 6 | Hepatitis C                                              | 2.77E-03 |
|    |                                             |          | 6 | Arachidonic acid metabolism                              | 4.86E-03 |
|    |                                             |          | 6 | Influenza A                                              | 4.86E-03 |
|    |                                             |          | 6 | Prolactin signaling pathway                              | 4.86E-03 |
|    |                                             |          | 6 | Pancreatic cancer                                        | 4.88E-03 |
|    |                                             |          | 6 | Leishmaniasis                                            | 4.93E-03 |
|    |                                             |          | 6 | Fc gamma R-mediated phagocytosis                         | 6.38E-03 |
|    |                                             |          | 6 | Glycerophospholipid metabolism                           | 6.73E-03 |
|    |                                             |          | 6 | Toll-like receptor signaling pathway                     | 7.79E-03 |
|    |                                             |          | 6 | Dorso-ventral axis formation                             | 8.22E-03 |
|    |                                             |          | 6 | Thyroid cancer                                           | 8.70E-03 |
|    |                                             |          | 6 | Toxoplasmosis                                            | 8.76E-03 |
|    |                                             |          | 6 | Thyroid hormone signaling pathway                        | 8.76E-03 |
|    |                                             |          | 7 | Fructose and mannose metabolism                          | 7.69E-05 |
|    |                                             |          | 7 | Non-alcoholic fatty liver disease (NAFLD)                | 9.09E-05 |
|    |                                             |          | 7 | Hypertrophic cardiomyopathy (HCM)                        | 1.00E-04 |
|    |                                             |          | 7 | Circadian rhythm                                         | 1.67E-04 |
|    |                                             |          | 7 | Oxytocin signaling pathway                               | 2.00E-04 |
|    |                                             |          | 7 | Insulin signaling pathway                                | 2.50E-04 |
|    |                                             |          | 7 | FoxO signaling pathway                                   | 3.33E-04 |
|    |                                             |          | 7 | AMPK signaling pathway                                   | 5.00E-04 |
|    |                                             |          | 7 | Adipocytokine signaling pathway                          | 5.00E-04 |
|    |                                             |          | 7 | Galactose metabolism                                     | 9.41E-04 |
|    |                                             |          | 7 | HIF-1 signaling pathway                                  | 1.32E-03 |
|    |                                             |          | 7 | Carbohydrate digestion and absorption                    | 1.91E-03 |
|    |                                             |          | 7 | Starch and sucrose metabolism                            | 3.27E-03 |
|    |                                             |          | 7 | Glycolysis / Gluconeogenesis                             | 4.83E-03 |

|  |  |  |  |    |                            |          |
|--|--|--|--|----|----------------------------|----------|
|  |  |  |  | 7  | PI3K-Akt signaling pathway | 8.33E-03 |
|  |  |  |  | 8  | DNA replication            | 1.00E-04 |
|  |  |  |  | 8  | Homologous recombination   | 1.43E-04 |
|  |  |  |  | 8  | Nucleotide excision repair | 2.00E-04 |
|  |  |  |  | 8  | Mismatch repair            | 3.85E-04 |
|  |  |  |  | 8  | Fanconi anemia pathway     | 1.00E-03 |
|  |  |  |  | 10 | Endocytosis                | 3.33E-04 |
|  |  |  |  | 12 | Spliceosome                | 5.00E-04 |

**Supplementary Fig. S1.** is moved to the last part of the supplementary figures.

## Liver of db/db mice administered with ESB

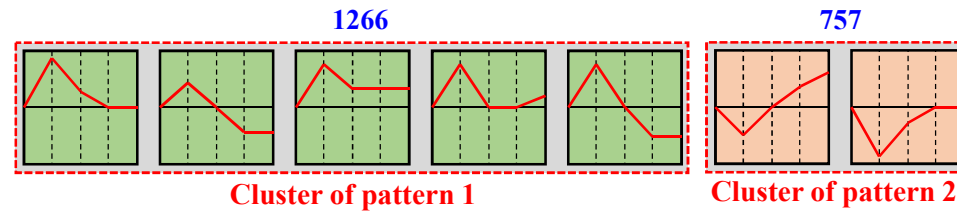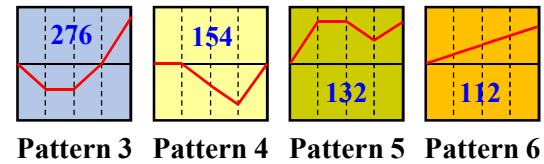

## HepG2 treated with ESB

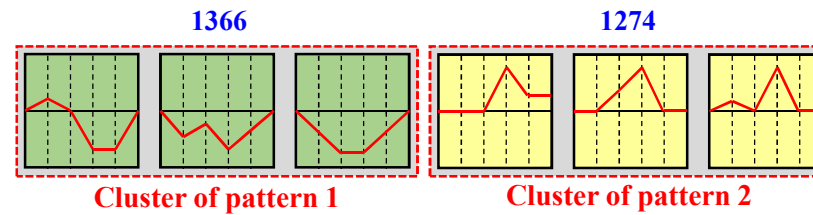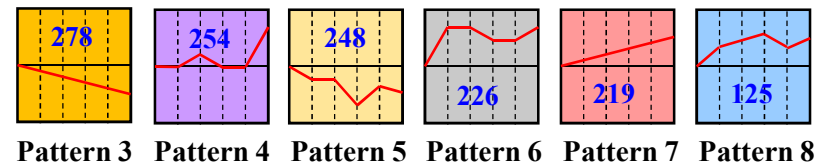

**Supplementary Fig. S2.** Significant patterns (FDR < 0.001) of gene expression analyzed by STEM. The numbers represent numbers of genes included in each patterns. Two major patterns with the largest numbers of genes are colored in red.

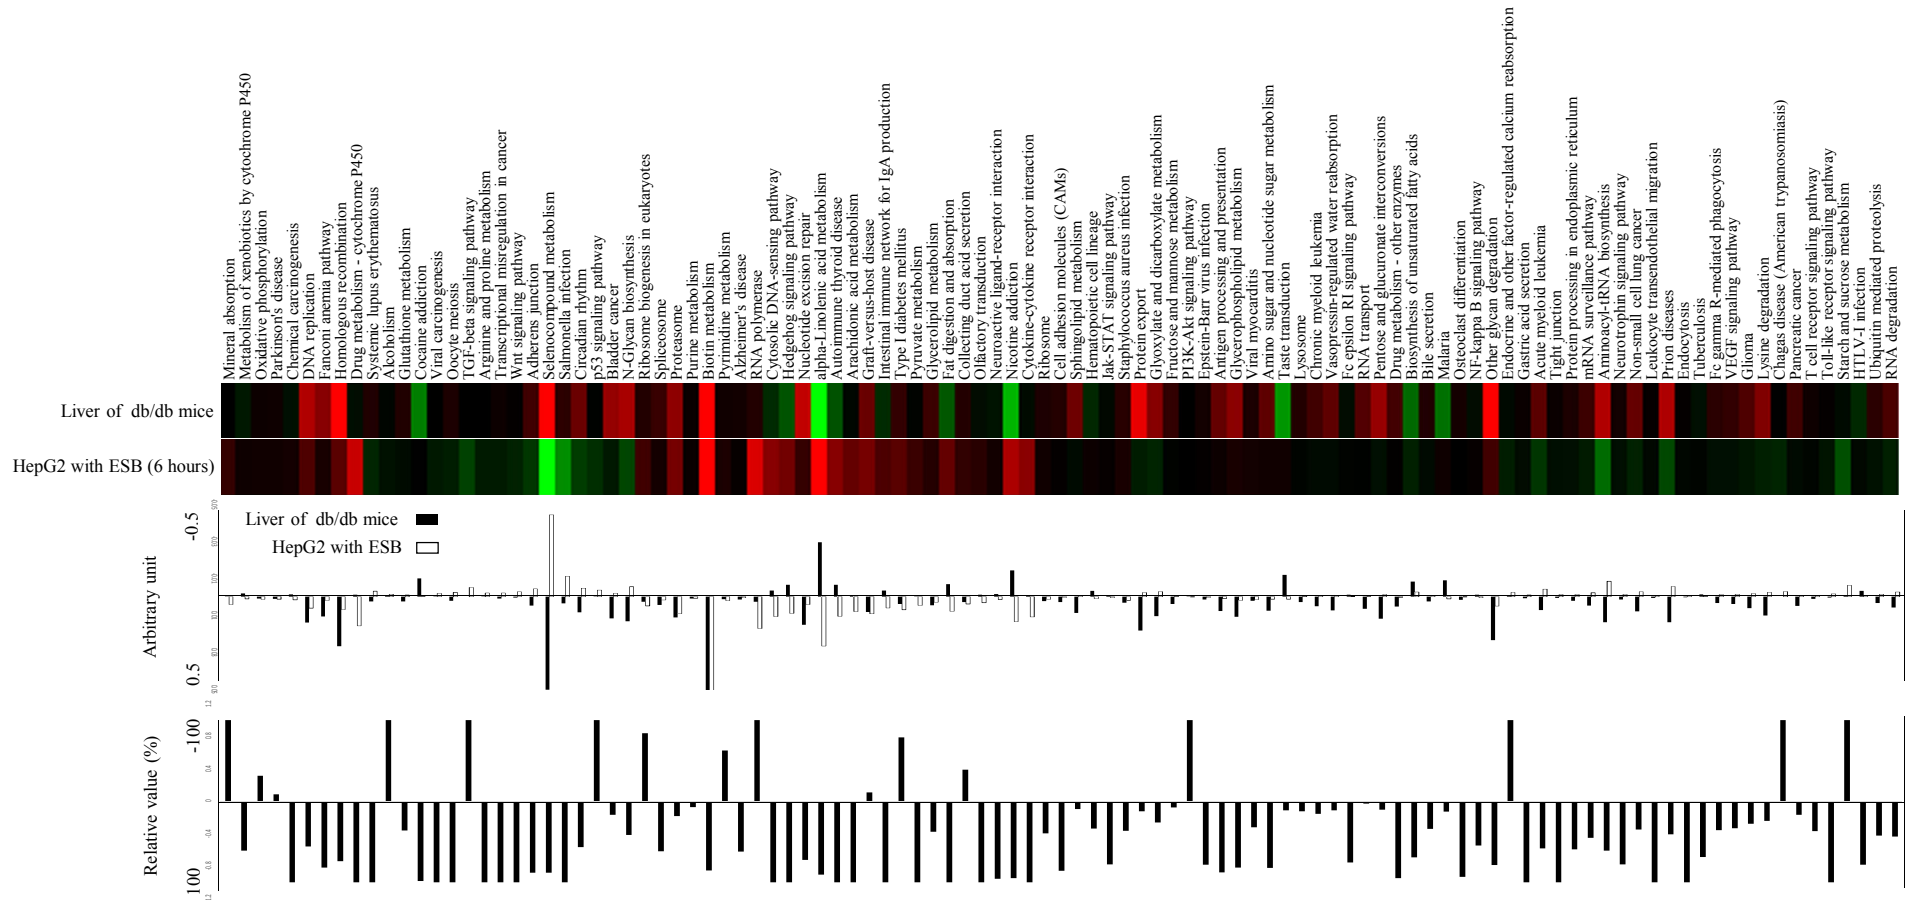

**Supplementary Fig. S3.** Pathway activities were compared between db/db mouse liver and HepG2 cells treated with ESB for 6 hours. The relative values for the pathway activities of ESB-treated HepG2 cells relative to those in db/db mouse liver are also shown.

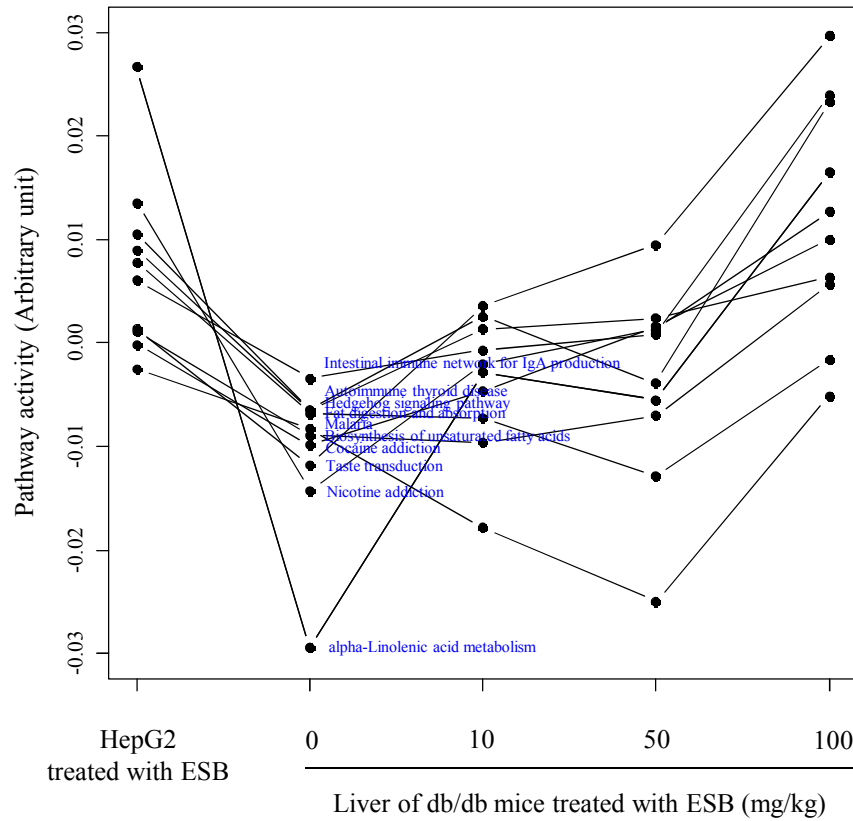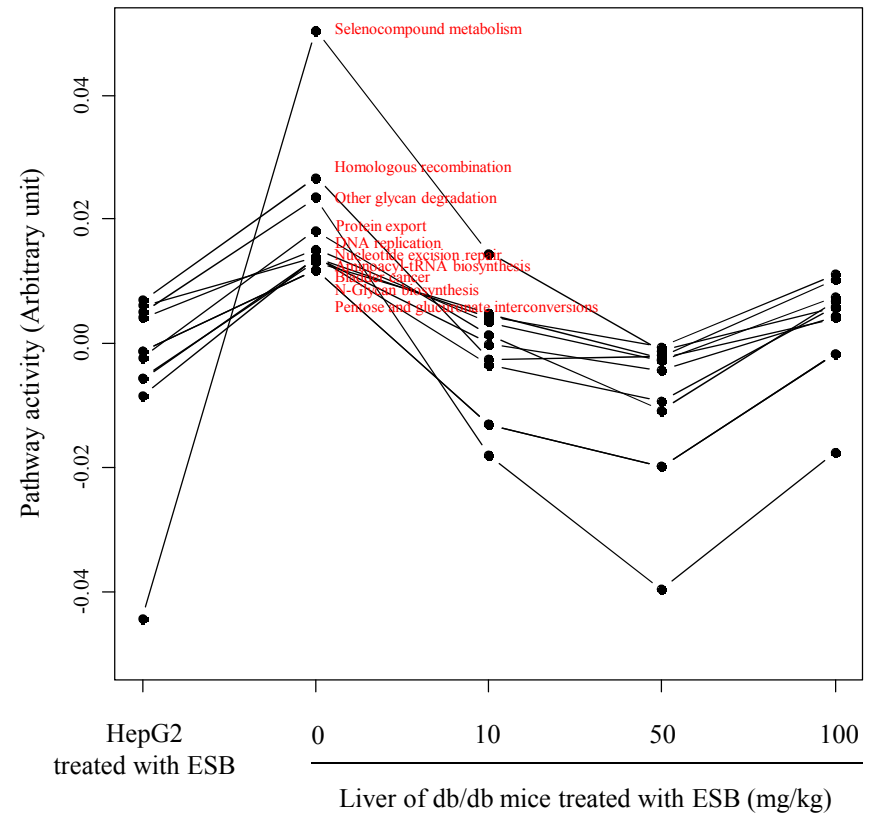

**Supplementary Fig. S4. Top 10 pathways recovered by ESB in db/db mouse liver.** The top 10 pathways most changed in db/db mouse liver were plotted. The downregulated pathways in db/db mouse liver were alpha-Linolenic acid metabolism, Nicotine addiction, Taste transduction, Cocaine addiction, Malaria, Biosynthesis of unsaturated fatty acids, Fat digestion and absorption, Hedgehog signaling pathway, Autoimmune thyroid disease, and Intestinal immune network for IgA production. The upregulated pathways in db/db mouse liver were Pentose and glucuronate interconversions, N-Glycan biosynthesis, Bladder cancer, Aminoacyl-tRNA biosynthesis, DNA replication, Nucleotide excision repair, Protein export, Other glycan degradation, Homologous recombination, and Selenocompound metabolism.



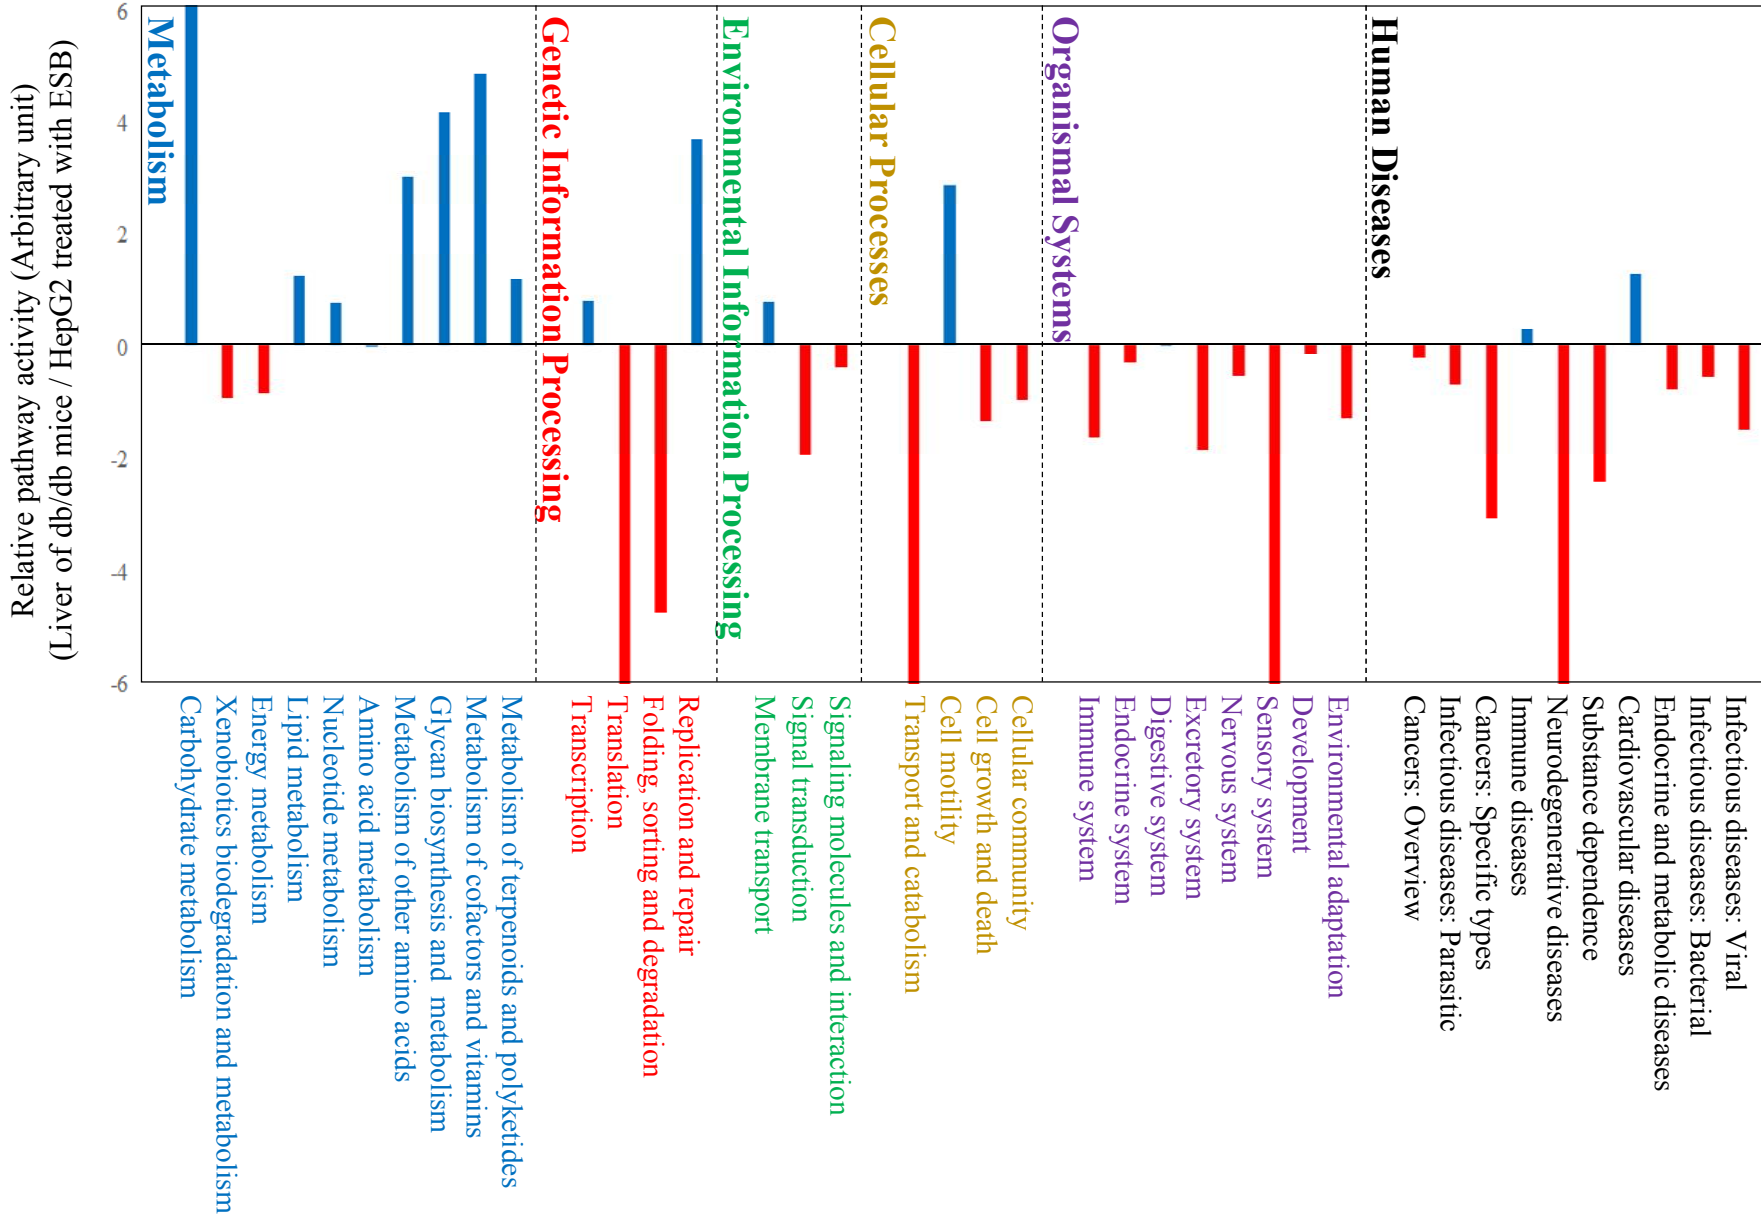

**Supplementary Fig. S5. Functional distribution of genes in db/db mouse liver and HepG2 cells treated with ESB.** The expression values of genes compared with the normal control in each functional category were log transformed and then linearly combined with a weight of  $-1$  for genes acting as repressors. The measured values from db/db mouse liver were divided by those from HepG2 cells treated with ESB. Statistical significance was measured by random permutation of genes ( $n = 1000$ ). The information for functional categories was imported from KEGG (<http://www.genome.jp/kegg/>).

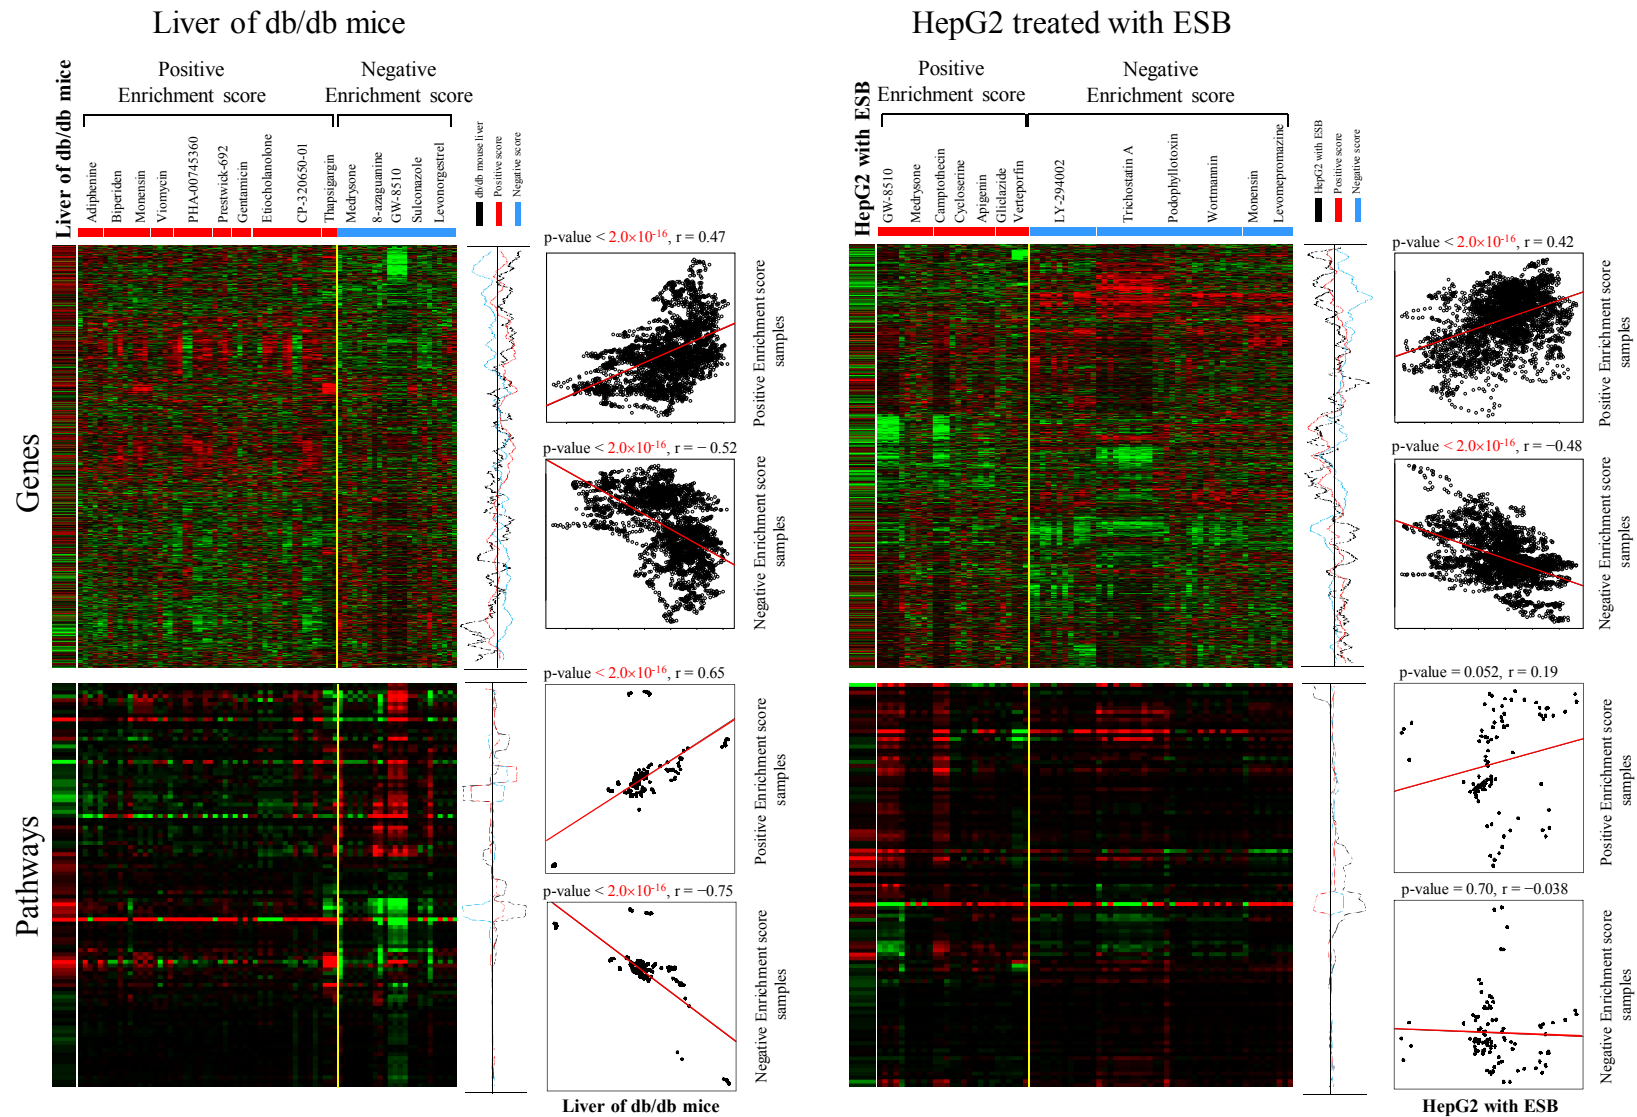

**Supplementary Fig. S6.** Comparison of gene expression values (or activity values) from db/db mouse liver with an averaged value of gene expression (or activity values) from highly ranked (permutated  $p$ -value < 0.001) cmap samples of positive or negative enrichment scores shows positive ( $r = 0.47$ ,  $p < 0.01$  for gene expression and  $r = 0.65$ ,  $p < 0.01$  for pathway activity) or negative ( $r = -0.52$ ,  $p < 0.01$  for gene expression and  $r = -0.75$ ,  $p < 0.01$  for pathway activity) correlation, respectively. In the case of ESB-treated HepG2 cells, we also measured similar results in gene expression pattern. Positive ( $r = 0.42$ ,  $p < 0.01$ ) or negative ( $r = -0.48$ ,  $p < 0.01$ ) correlation was observed between gene expression values of ESB-treated HepG2 cells and those of averaged samples with positive or negative enrichment scores in the cmap database, respectively. However, in the pathway activity of ESB-treated HepG2 cells, no statistically significant relationship was found.

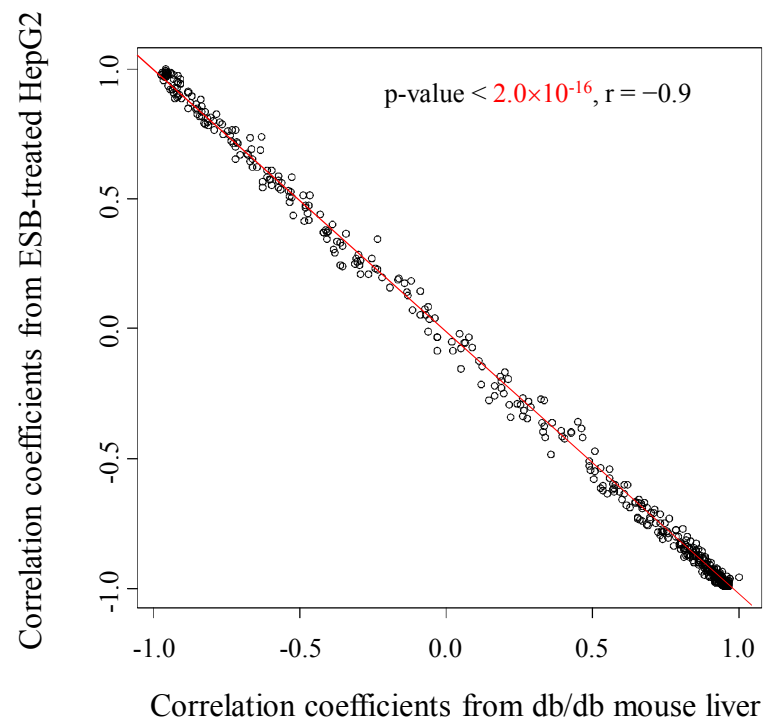

**Supplementary Fig. S7.** Validation of the cmap-based approach. Five hundred randomly chosen chemicals from the cmap database were analysed by cmap. The distribution of enrichment scores for random chemicals was compared with that of db/db mouse liver and ESB-treated HepG2 cells. Correlation coefficients obtained from db/db mouse liver and ESB-treated HepG2 cells were plotted for random chemicals.

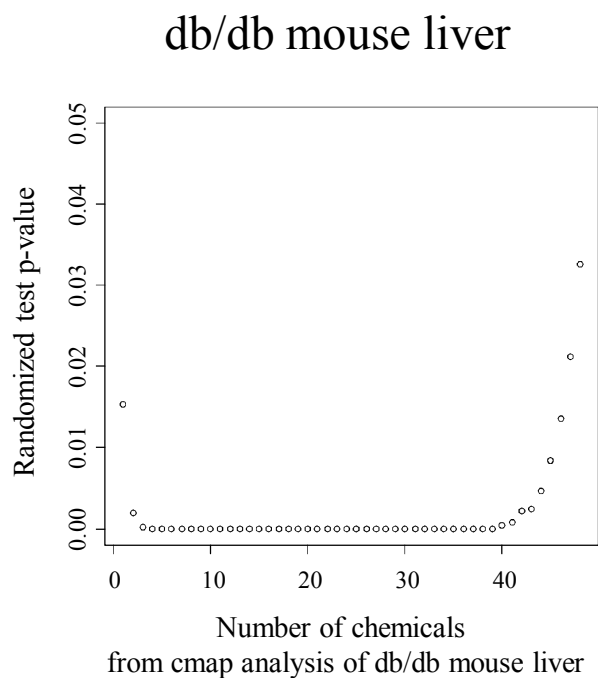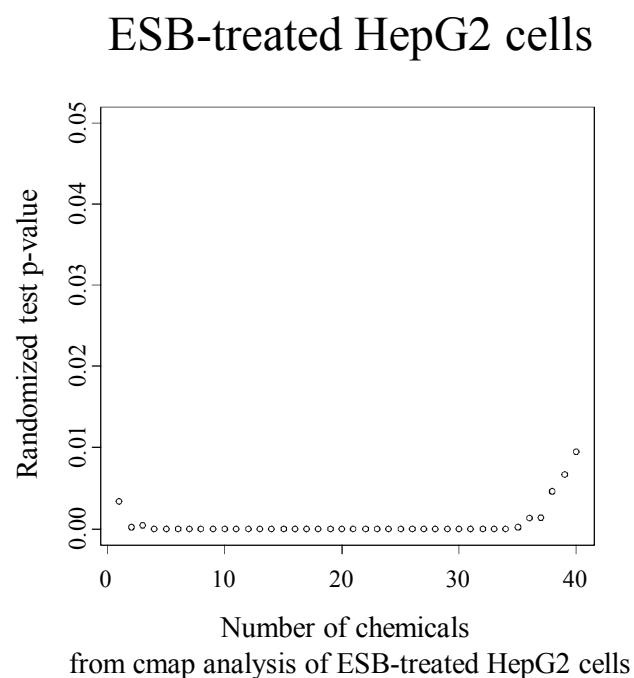

**Supplementary Fig. S8.** Keyword-based literature-mining analysis of cmap results. We used all the chemicals (1309 chemicals) present in the cmap database to search for papers with keywords connected to diabetes-related diseases and conditions. We then changed the referred numbers of papers to 0 (absence of reference paper) and 1 (presence of reference paper) to eliminate bias induced by a few heavily referred chemicals. We then compared the total sum of the original dataset with the same-sized randomly selected dataset repeatedly 1000 times. The relative position of the sum of the original dataset among those of the randomized test sets was measured as a ratio and used as a statistic (randomized test p-value). We measured this value by increasing the number of chemicals included in the original dataset starting from the most referred chemical.

Liver of db/db mice

HepG2 treated with ESB

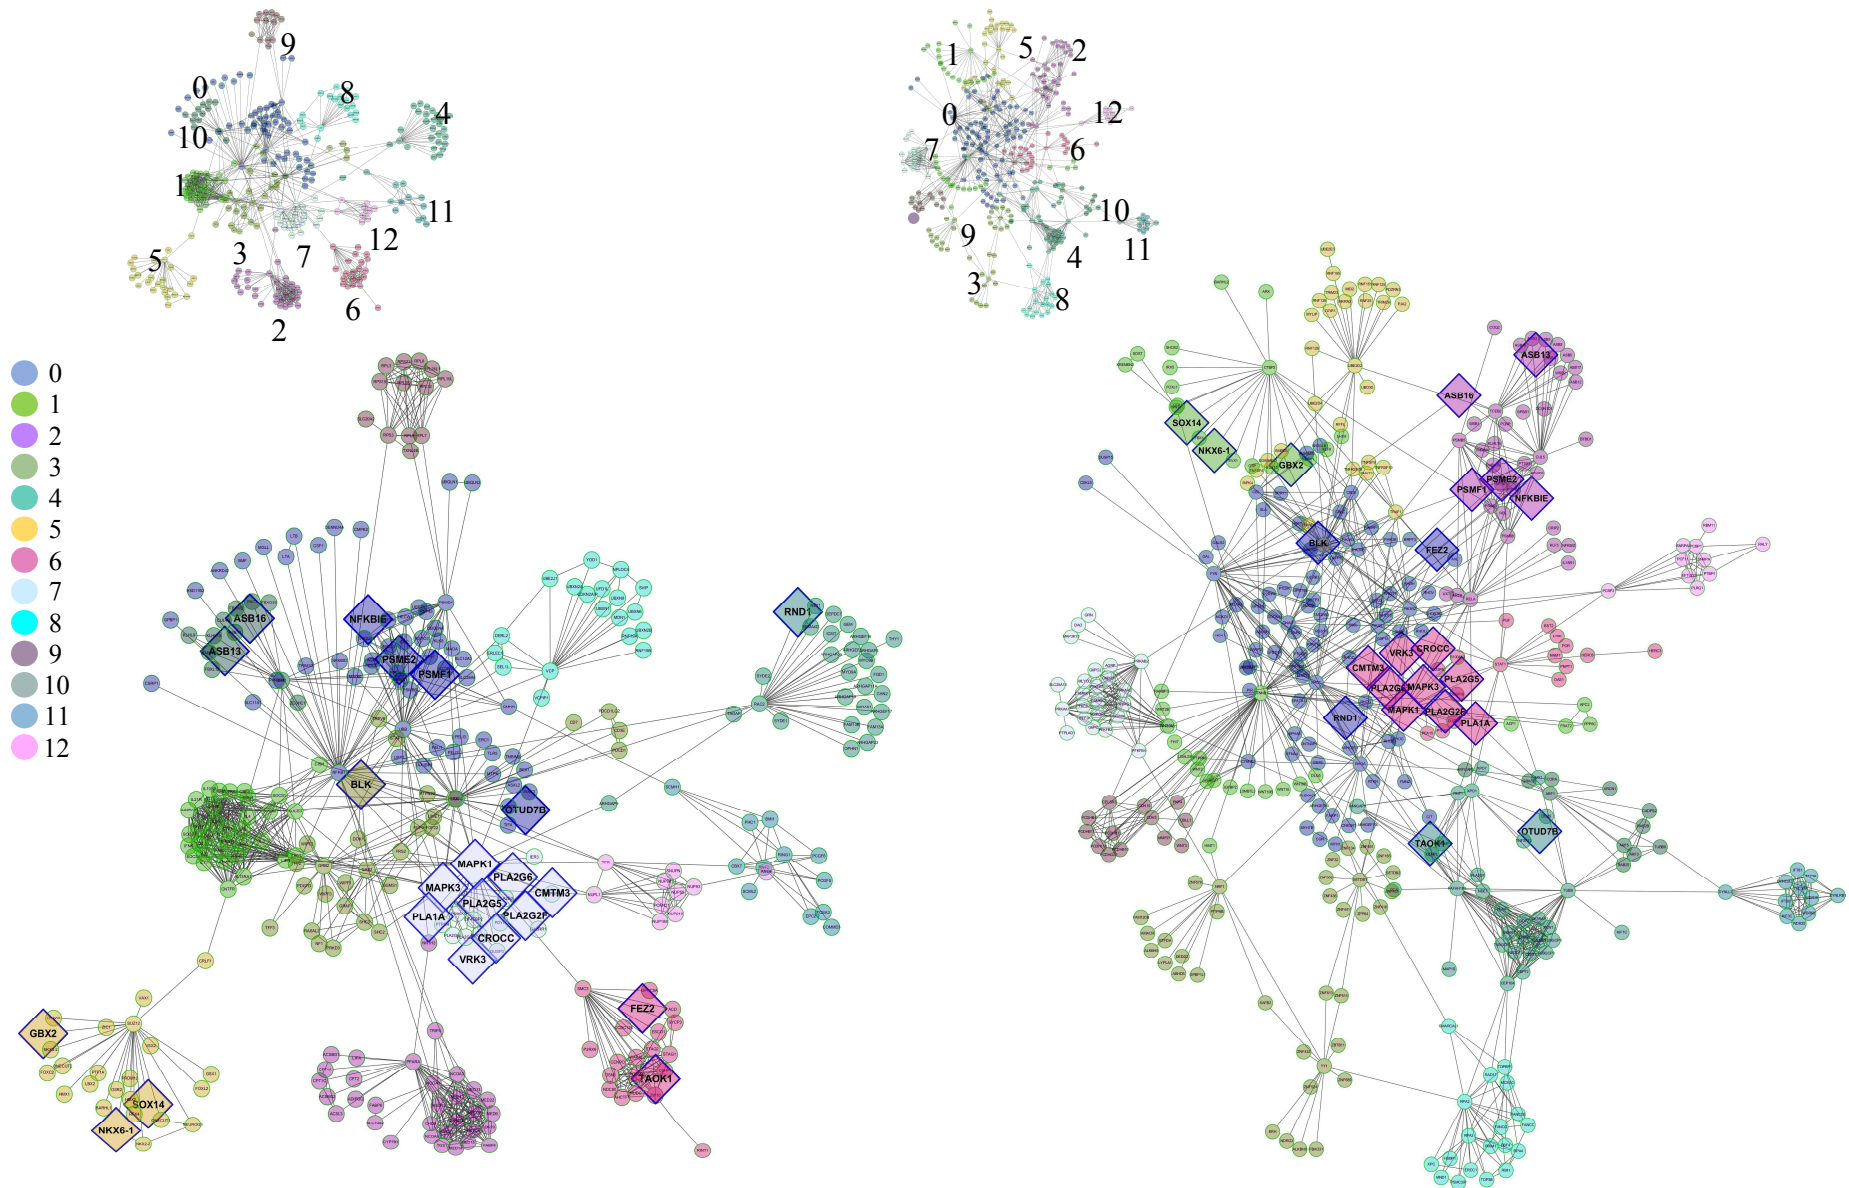

**Supplementary Fig. S9.** Common genes in the functional networks of db/db mouse liver and HepG2 cells treated with ESB are highlighted in with a diamond shape.





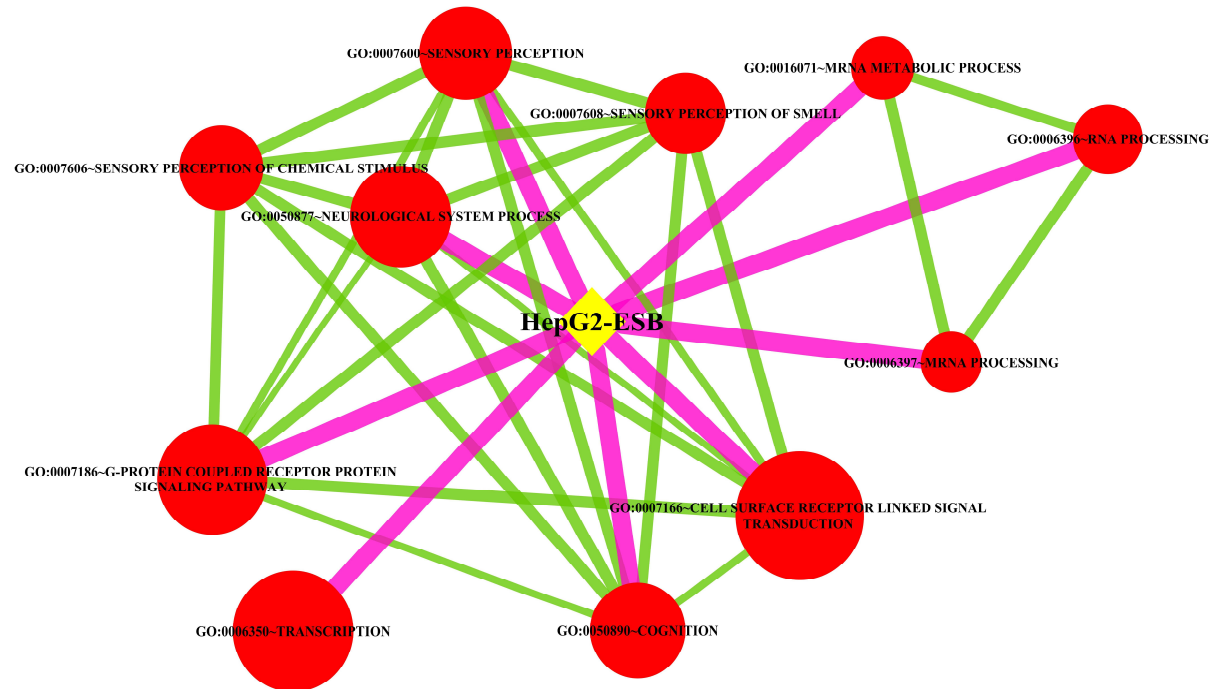

**Supplementary Fig. S11.** Enrichment map analysis. GO terms significantly associated with db/db mouse liver (FDR < 0.01) were used to construct the GO term network by implementing the Enrichment map program. The size of each node represents the number of genes included in that category of GO term, and the thickness of each edge line represents the number of common genes between two GO terms. Differentially expressed genes in HepG2 cells after ESB treatment for 6 hours are mapped on this GO term network. The relationship of GO terms with differentially expressed genes in HepG2 cells after ESB treatment was obtained using a hypergeometric test with 0.01 cut-off for the determination of edge weight. Yellow diamonds represent genes from ESB-treated HepG2 cells and purple edge lines show the presence of ESB-responsive genes in HepG2 cells included in each GO term category. The thickness of each purple edge line is in proportion to the number of common genes.

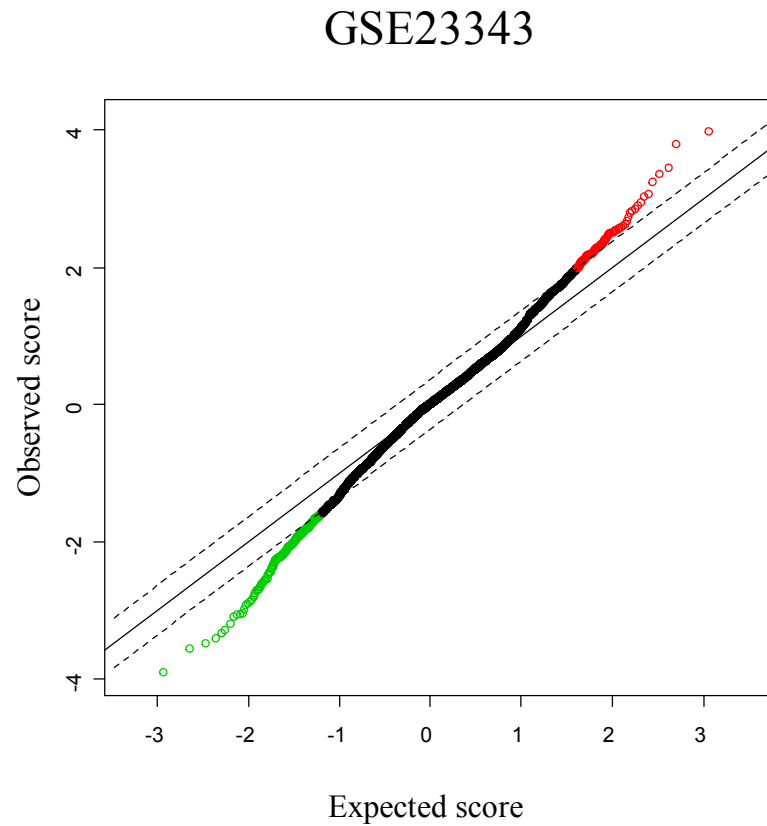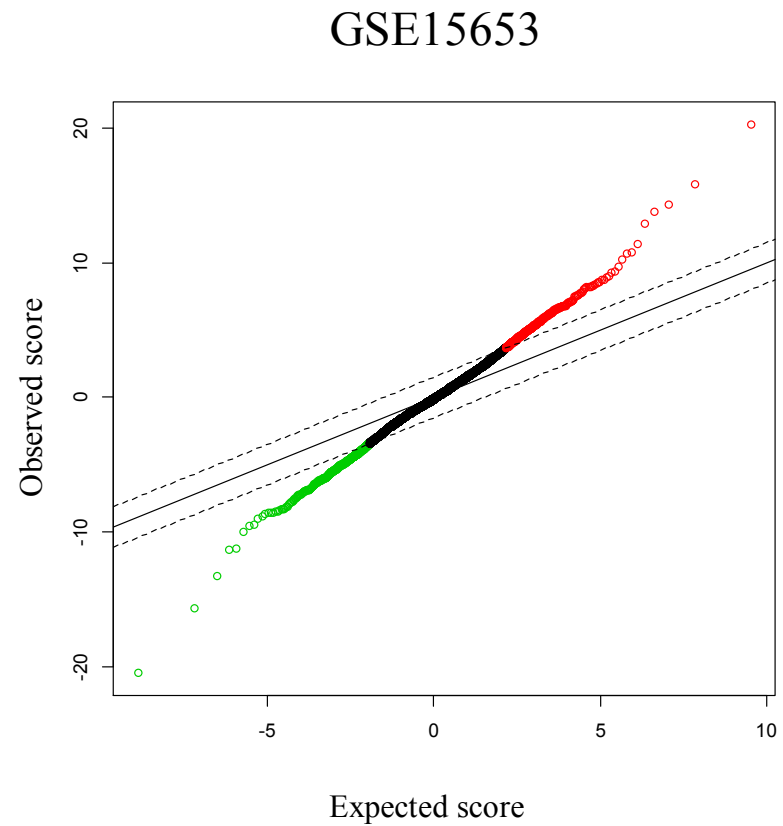

**Supplementary Fig. S12.** Genes used as input tags for cmap analysis were identified using Significance Analysis of Microarray (SAM). For the microarray data from the two public databases GSE23323 and GSE15653, SAM scores for the absolute values of 2.0 and 4.0 were used for the threshold value and corresponded to an FDR < 0.3 and FDR < 0.05, respectively. Red and green circles represent genes in the disease samples that were up- and downregulated, respectively, compared with normal control samples. The dotted line represents the threshold line.



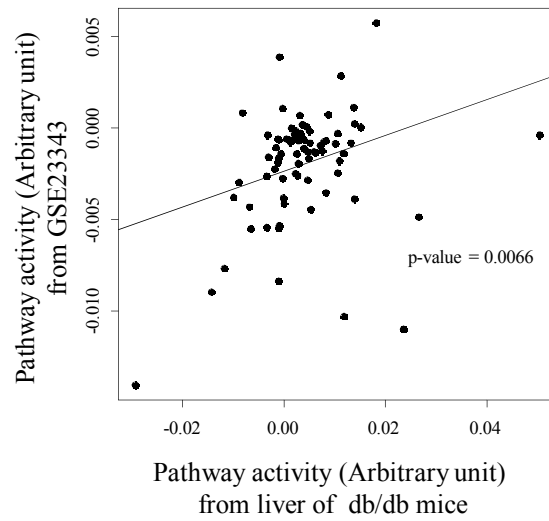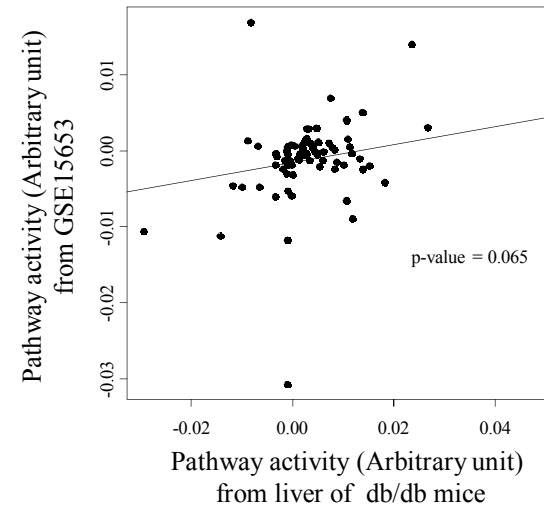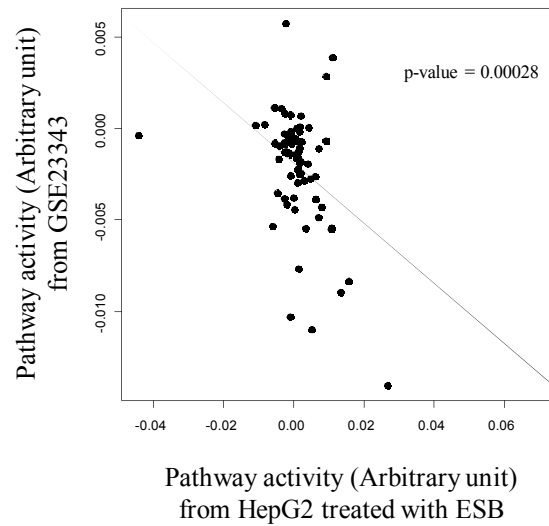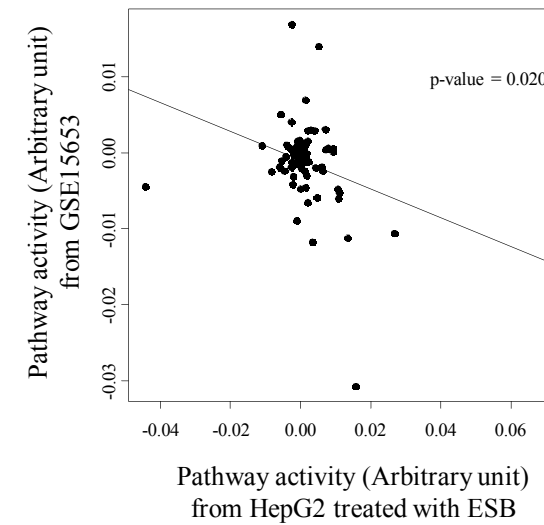

**Supplementary Fig. S13.** Comparison of pathway activities between db/db mouse liver, ESB-treated HepG2 cells, and liver samples of diabetic patients. Pathway activities from two publically available microarray databased of liver samples from diabetic patients (GSE23323 and GSE15653) were compared with those from db/db mouse liver and ESB-treated HepG2 cells.

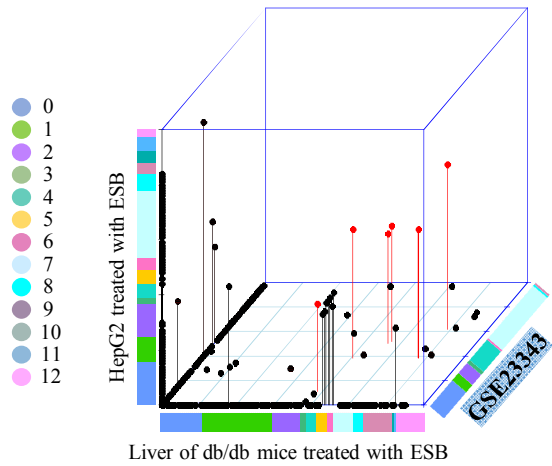

| GO Terms                                       | Module     |          |       |
|------------------------------------------------|------------|----------|-------|
|                                                | db/db mice | GSE23343 | HepG2 |
| Phosphatidylcholine acyl-chain remodeling      | 7          | 4        | 6     |
| Phosphatidylethanolamine acyl-chain remodeling | 7          | 4        | 6     |
| Small GTPase mediated signal transduction      | 4          | 3        | 0     |
| Small molecule metabolic process               | 12         | 7        | 7     |
| Transcription, DNA-dependent                   | 5,11       | 6        | 3     |

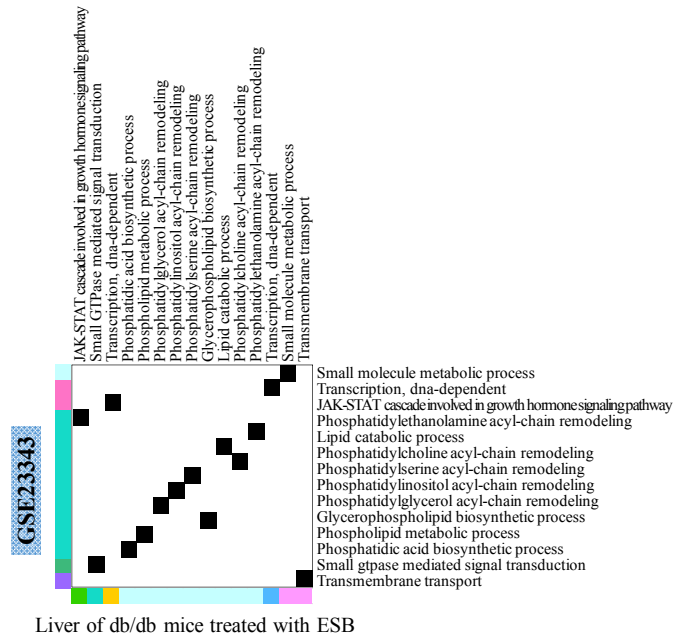

Liver of db/db mice treated with ESB

**Supplementary Fig. S14.** The functional interaction network was constructed from the gene expression patterns in db/db mouse liver, ESB-treated HepG2 cells, and liver samples from patients with diabetes (GSE23323 and GSE15653) by implementing the Reactome FI application. Common GO terms associated with each module ( $p < 0.01$ ) are shown in red and listed. Functional similarities between the db/db mouse liver and human liver samples (GSE23323 and GSE15653) are also plotted according to the GO terms associated with the modules.

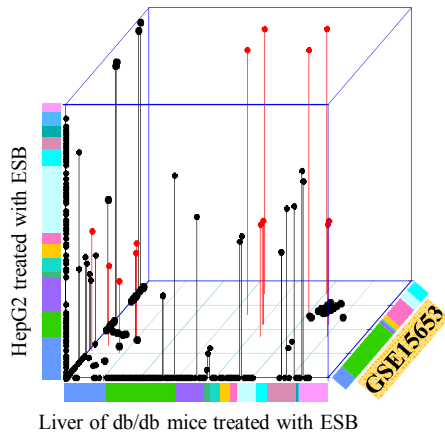

| GO Terms                                                                                      | Module     |          |       |
|-----------------------------------------------------------------------------------------------|------------|----------|-------|
|                                                                                               | db/db mice | GSE15653 | HepG2 |
| DNA damage response, signal transduction by p53 class mediator resulting in cell cycle arrest | 0          | 1        | 2     |
| Gene expression                                                                               | 2,9        | 6,8      | 12    |
| Mitotic cell cycle                                                                            | 6,12       | 1        | 4     |
| Negative regulation of ubiquitin-protein ligase activity involved in mitotic cell cycle       | 0          | 2        | 1     |
| Positive regulation of NF-kB transcription factor activity                                    | 0          | 1        | 5     |
| Positive regulation of ubiquitin-protein ligase activity involved in mitotic cell cycle       | 0          | 1        | 2     |
| Protein poly ubiquitination                                                                   | 0          | 1        | 2     |
| Transcription, DNA-dependent                                                                  | 5,11       | 2        | 3     |

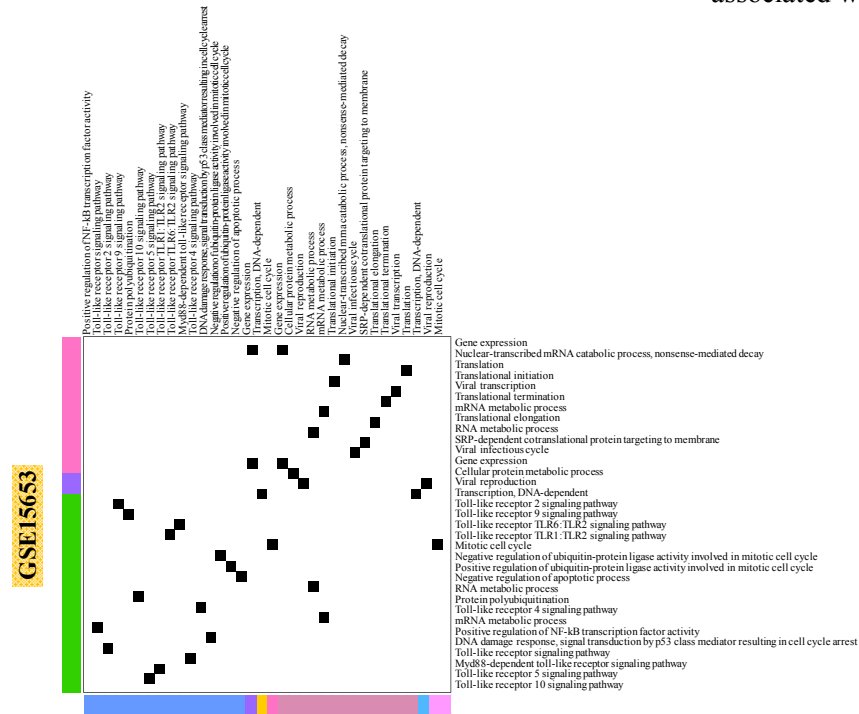

Liver of db/db mice treated with ESB



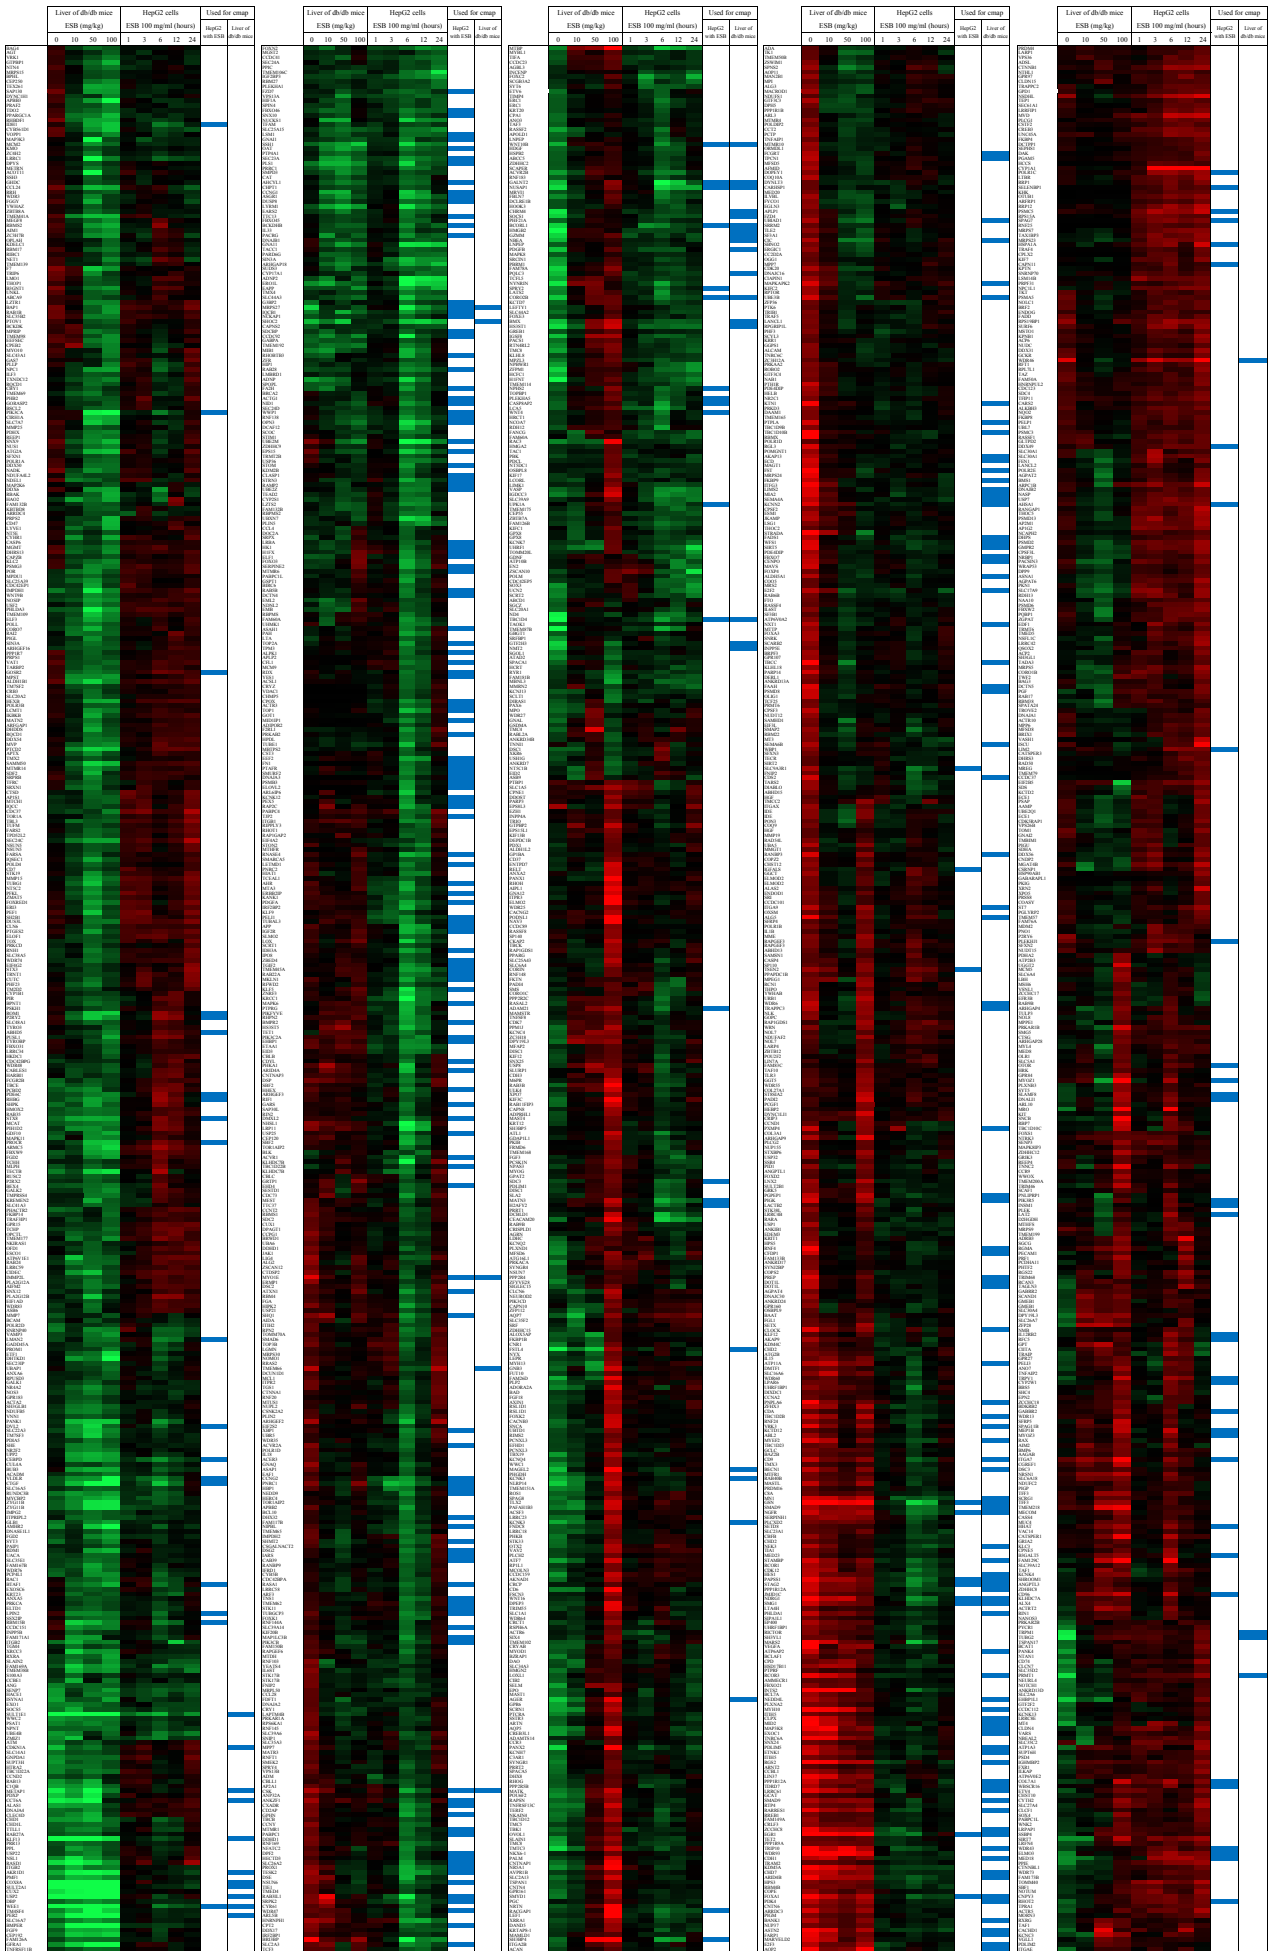

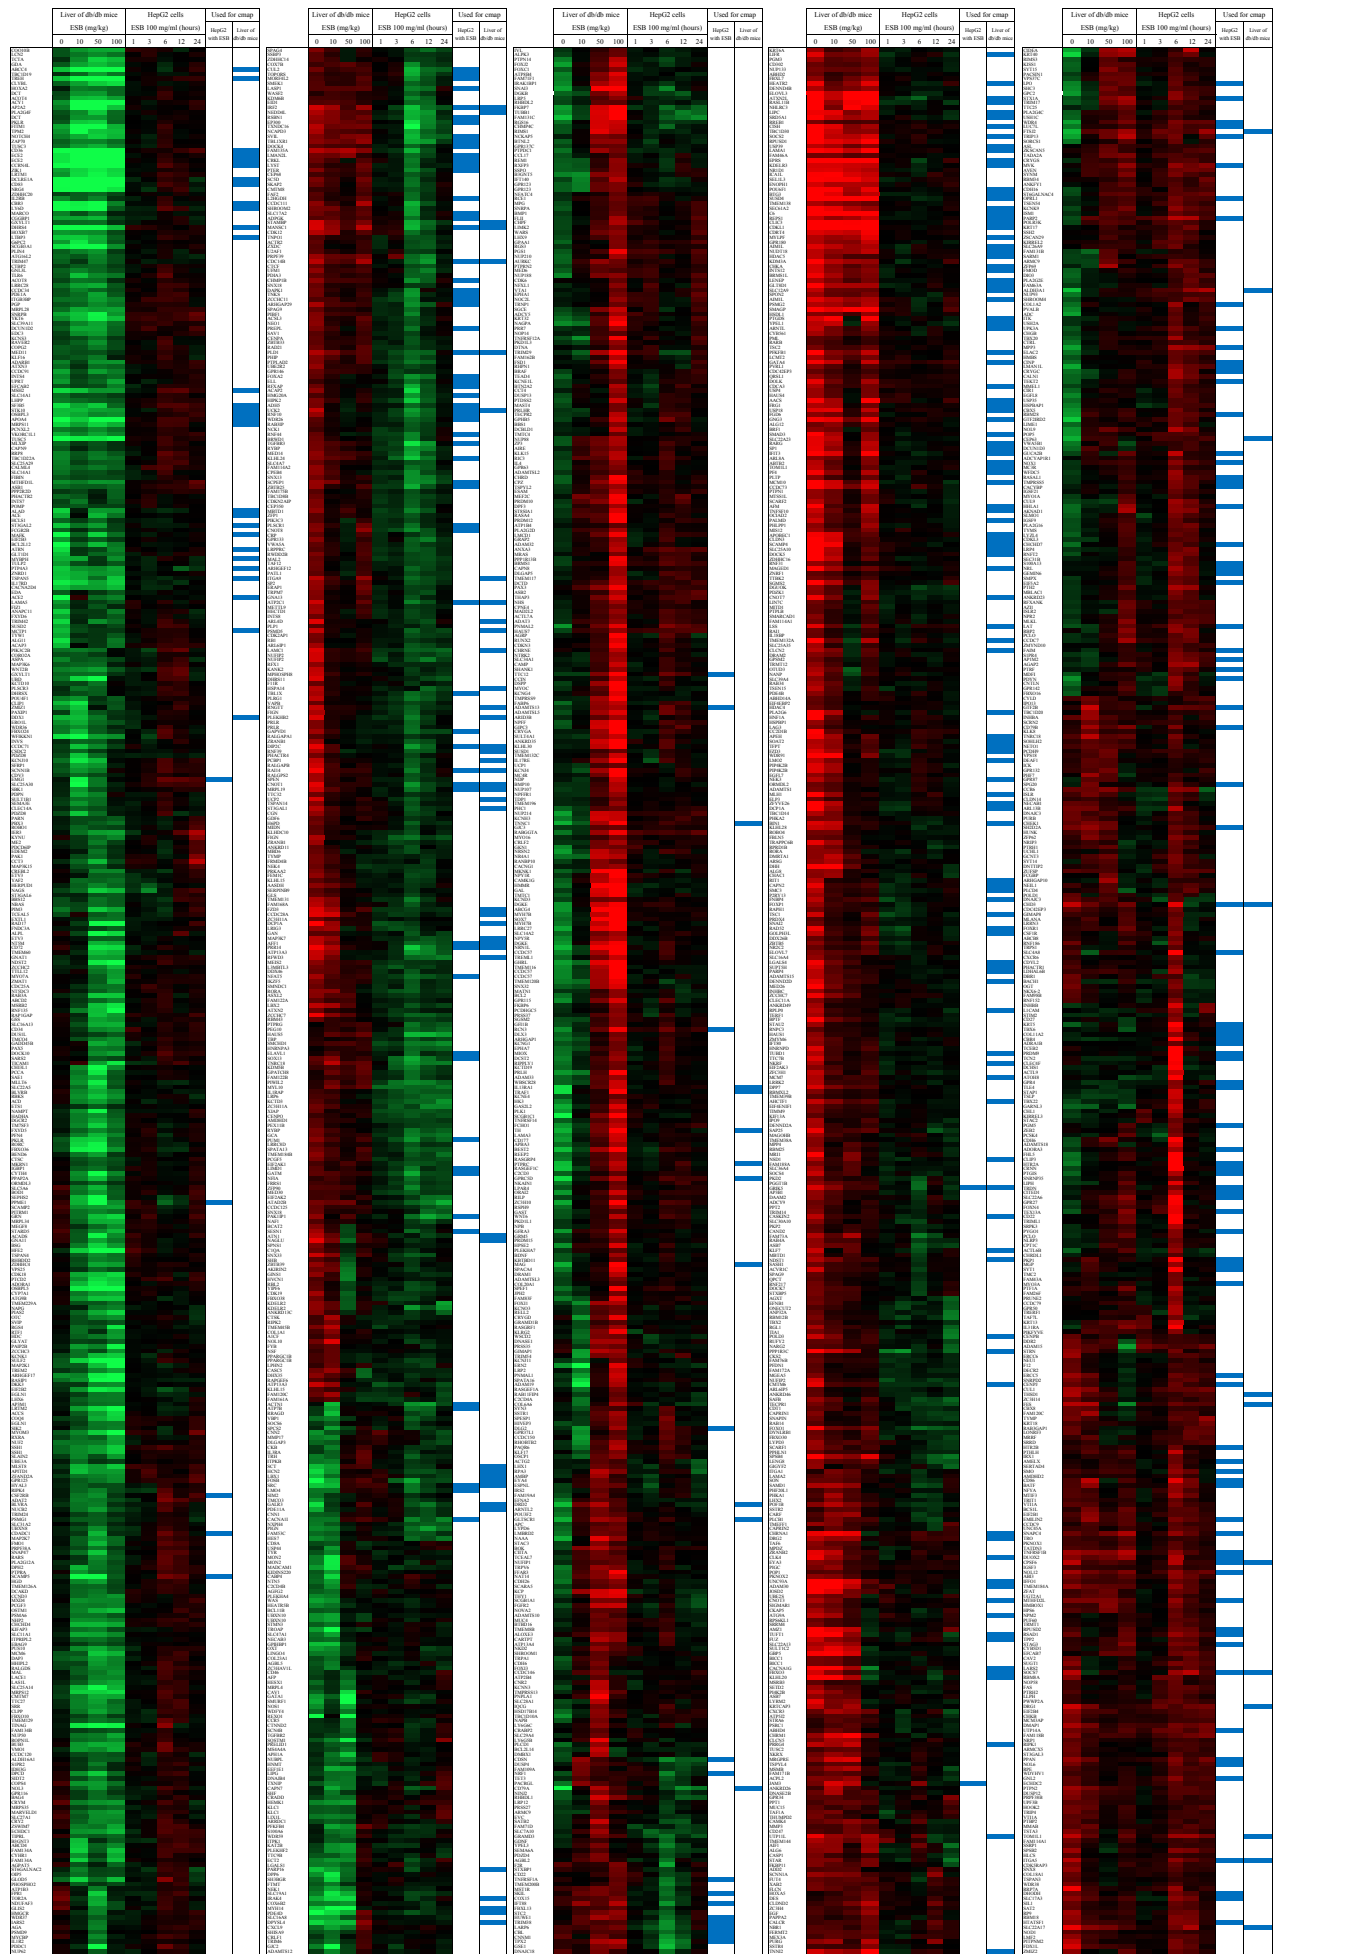

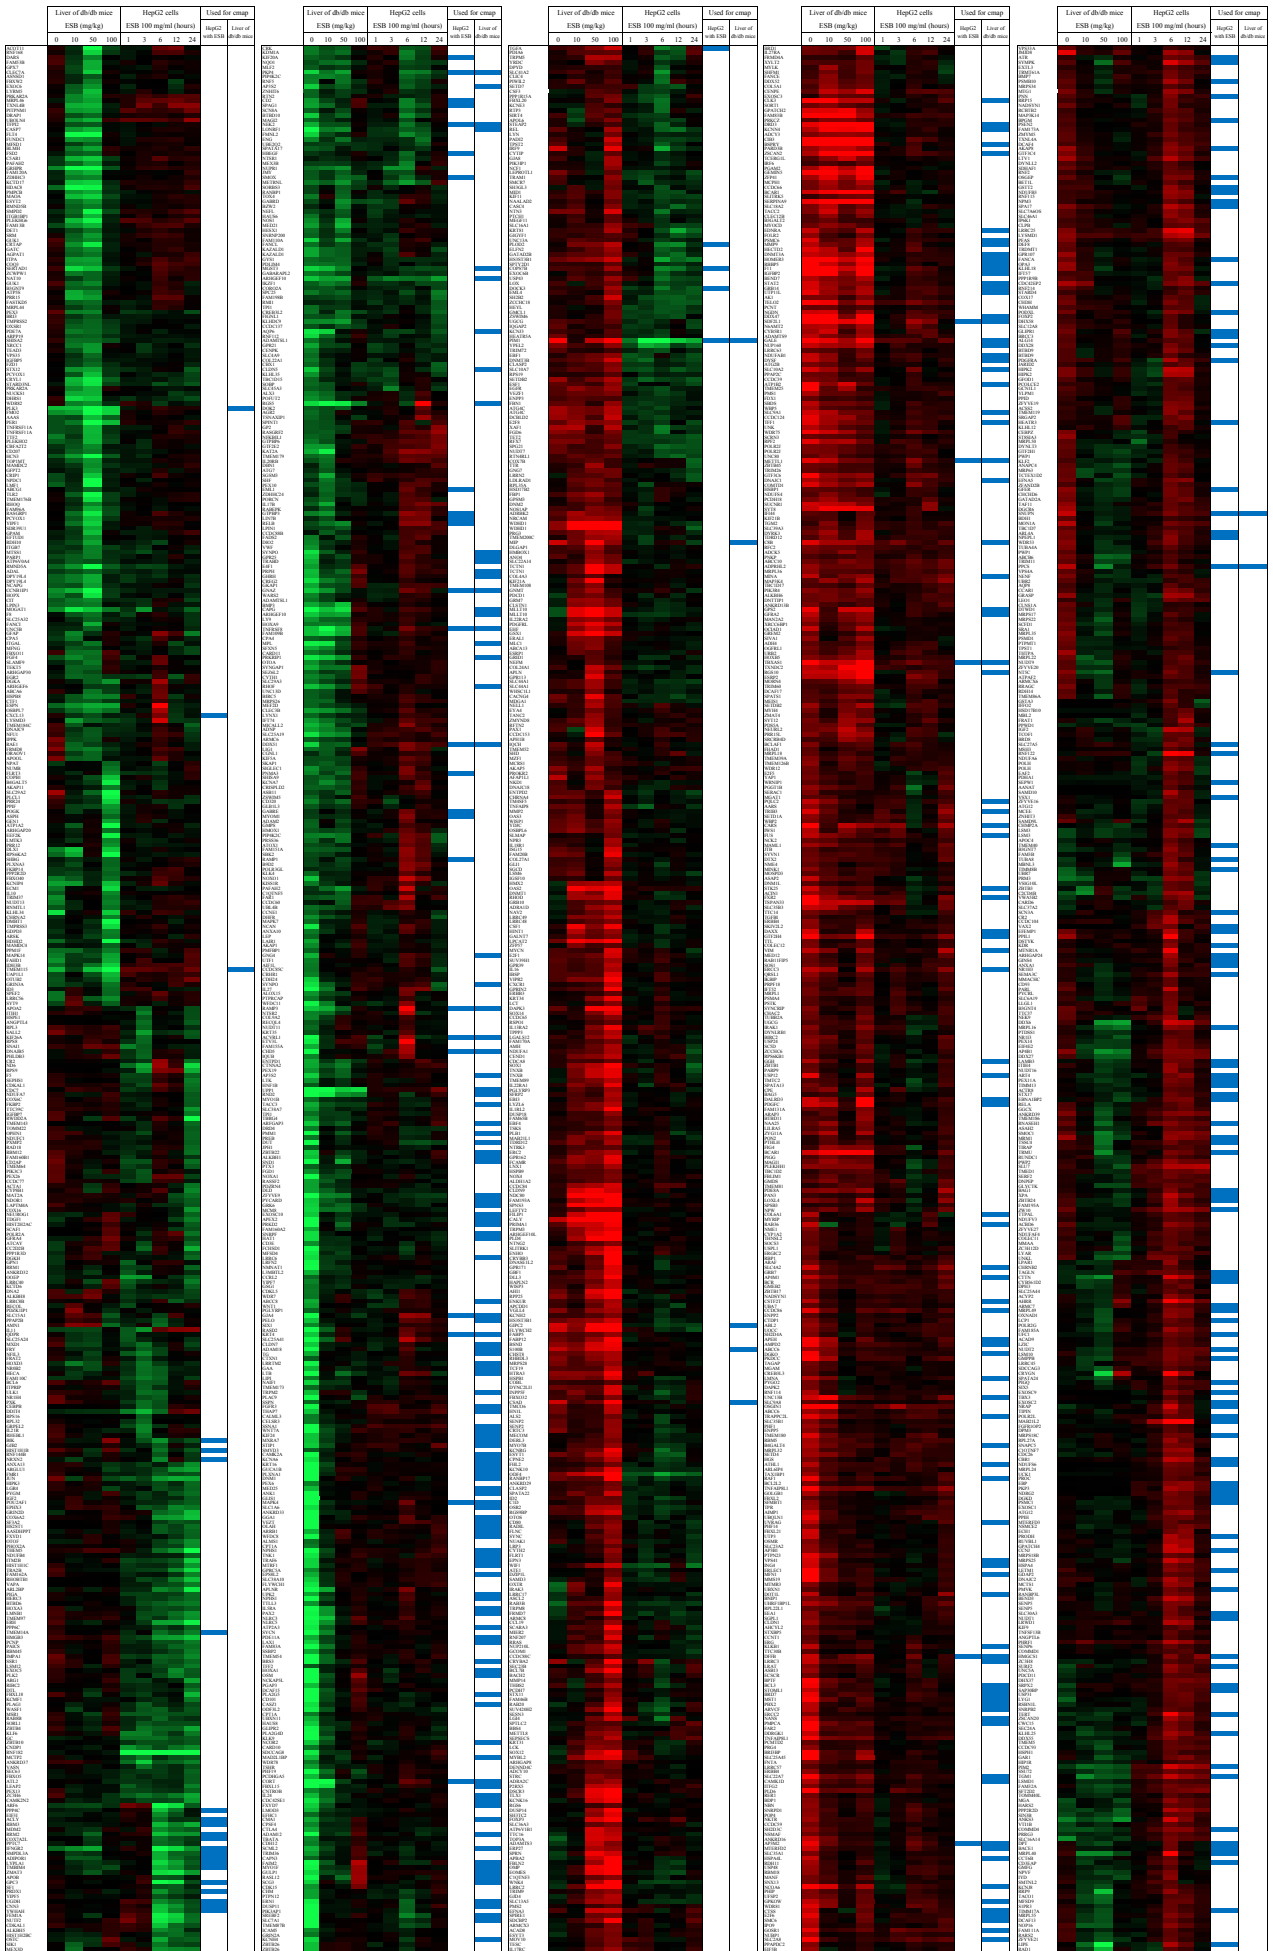

Supplement: srep41711-s1.pdf [file srep41711-s1.pdf]
